# Supplementary material for: Quality of life is substantially worse for community-dwelling older people living with frailty: systematic review and meta-analysis
Source: Springer Nature journal article supplement (doi:10.1007/s11136-019-02149-1), 2019-03-14

## Pooled mean differences for QOL measures for people with and without frailty

| Measure / study         | Not frail |      |      | Frail |      |    | Weight | Mean difference<br>IV, random, 95% CI |
|-------------------------|-----------|------|------|-------|------|----|--------|---------------------------------------|
|                         | Mean      | SD   | N    | Mean  | SD   | N  |        |                                       |
| SF-36 Physical function |           |      |      |       |      |    |        |                                       |
| Chang 2012              | 79.5      | 19.9 | 352  | 54.8  | 26.2 | 22 | 16.7%  | 24.70 [13.56, 35.84]                  |
| Jurschik 2012           | 68.4      | 26.3 | 473  | 24.3  | 24.4 | 50 | 20.2%  | 44.10 [36.93, 51.27]                  |
| Lenardt 2014            | 77.5      | 23.4 | 164  | 61.1  | 27.9 | 39 | 18.2%  | 16.40 [6.94, 25.86]                   |
| Lin 2011                | 83.1      | 26.5 | 841  | 62.7  | 18.8 | 92 | 22.4%  | 20.40 [16.16, 24.64]                  |
| Masel 2009              | 50.9      | 31   | 811  | 23.3  | 24.2 | 20 | 22.5%  | 27.60 [23.63, 31.57]                  |
| Subtotal (95% CI)       |           |      | 2641 |       |      | 40 | 100.0% | 26.80 [18.47, 35.13]                  |

Heterogeneity:  $\tau^2 = 76.02$ ;  $\chi^2 = 35.83$ ,  $df = 4$  ( $P < 0.00001$ );  $I^2 = 89\%$

Test for overall effect:  $Z = 6.31$  ( $P < 0.00001$ )

|                     |      |      |      |      |      |    |        |                      |
|---------------------|------|------|------|------|------|----|--------|----------------------|
| SF-36 Role—Physical |      |      |      |      |      |    |        |                      |
| Chang 2012          | 76.7 | 39.5 | 352  | 45.5 | 48.6 | 22 | 14.5%  | 31.20 [10.48, 51.92] |
| Jurschik 2012       | 82.8 | 32.5 | 473  | 42.4 | 46.3 | 50 | 19.6%  | 40.40 [27.24, 53.56] |
| Lenardt 2014        | 85.2 | 32.2 | 164  | 71.1 | 41.1 | 39 | 19.2%  | 14.10 [0.29, 27.91]  |
| Lin 2011            | 88.7 | 53.5 | 841  | 78.2 | 38   | 92 | 22.8%  | 10.50 [1.93, 19.07]  |
| Masel 2009          | 62.7 | 45.8 | 811  | 31.4 | 43.2 | 20 | 23.9%  | 31.30 [24.53, 38.07] |
| Subtotal (95% CI)   |      |      | 2641 |      |      | 40 | 100.0% | 25.03 [13.19, 36.87] |

Heterogeneity:  $\tau^2 = 140.75$ ;  $\chi^2 = 22.32$ ,  $df = 4$  ( $P = 0.0002$ );  $I^2 = 82\%$

Test for overall effect:  $Z = 4.14$  ( $P < 0.0001$ )

|                   |      |      |      |      |      |    |        |                      |
|-------------------|------|------|------|------|------|----|--------|----------------------|
| SF-36 Bodily pain |      |      |      |      |      |    |        |                      |
| Chang 2012        | 78.2 | 21.3 | 352  | 59.2 | 17.4 | 22 | 19.2%  | 19.00 [11.40, 26.60] |
| Jurschik 2012     | 40.9 | 15.8 | 473  | 42   | 19.7 | 50 | 20.9%  | -1.10 [-6.74, 4.54]  |
| Lenardt 2014      | 67.4 | 30.7 | 164  | 60.4 | 30.7 | 39 | 16.3%  | 7.00 [-3.72, 17.72]  |
| Lin 2011          | 82.4 | 26.7 | 841  | 74.3 | 19.1 | 92 | 21.9%  | 8.10 [3.80, 12.40]   |
| Masel 2009        | 68.4 | 28.7 | 811  | 49.7 | 31   | 20 | 21.6%  | 18.70 [13.97, 23.43] |
| Subtotal (95% CI) |      |      | 2641 |      |      | 40 | 100.0% | 10.38 [2.56, 18.20]  |

Heterogeneity:  $\tau^2 = 67.77$ ;  $\chi^2 = 34.19$ ,  $df = 4$  ( $P < 0.00001$ );  $I^2 = 88\%$

Test for overall effect:  $Z = 2.60$  ( $P = 0.009$ )

|                      |      |      |     |      |      |    |       |                      |
|----------------------|------|------|-----|------|------|----|-------|----------------------|
| SF-36 General health |      |      |     |      |      |    |       |                      |
| Chang 2012           | 60.2 | 14.1 | 352 | 48.7 | 18.9 | 22 | 19.1% | 11.50 [3.47, 19.53]  |
| Jurschik 2012        | 68.4 | 26.3 | 473 | 24.3 | 24.4 | 50 | 19.5% | 44.10 [36.93, 51.27] |
| Lenardt 2014         | 73.9 | 22.6 | 164 | 71.4 | 17   | 39 | 19.9% | 2.50 [-3.86, 8.86]   |

|                   |      |      |      |      |      |    |        |                      |
|-------------------|------|------|------|------|------|----|--------|----------------------|
| Lin 2011          | 63.8 | 31.5 | 841  | 49.2 | 22.3 | 92 | 20.4%  | 14.60 [9.57, 19.63]  |
| Masel 2009        | 61.2 | 20.1 | 811  | 43.5 | 20.9 | 20 | 21.0%  | 17.70 [14.49, 20.91] |
| Subtotal (95% CI) |      |      | 2641 |      |      | 40 | 100.0% | 18.01 [7.17, 28.86]  |

Heterogeneity:  $\tau^2 = 143.11$ ;  $\chi^2 = 77.70$ ,  $df = 4$  ( $P < 0.00001$ );  $I^2 = 95\%$

Test for overall effect:  $Z = 3.26$  ( $P = 0.001$ )

#### SF-36 Vitality

|                   |      |      |      |      |      |    |        |                      |
|-------------------|------|------|------|------|------|----|--------|----------------------|
| Chang 2012        | 71.2 | 17.9 | 352  | 55.9 | 19.4 | 22 | 15.9%  | 15.30 [6.98, 23.62]  |
| Jurschik 2012     | 58   | 17.6 | 473  | 40.8 | 18.5 | 50 | 21.2%  | 17.20 [11.83, 22.57] |
| Lenardt 2014      | 78.9 | 21.4 | 164  | 75   | 24.4 | 39 | 15.9%  | 3.90 [-4.43, 12.23]  |
| Lin 2011          | 74.9 | 30.2 | 841  | 63.2 | 21.5 | 92 | 22.2%  | 11.70 [6.86, 16.54]  |
| Masel 2009        | 64.6 | 21.7 | 811  | 44.6 | 22.6 | 20 | 24.7%  | 20.00 [16.53, 23.47] |
| Subtotal (95% CI) |      |      | 2641 |      |      | 40 | 100.0% | 14.25 [9.17, 19.32]  |

Heterogeneity:  $\tau^2 = 24.09$ ;  $\chi^2 = 16.46$ ,  $df = 4$  ( $P = 0.002$ );  $I^2 = 76\%$

Test for overall effect:  $Z = 5.50$  ( $P < 0.00001$ )

#### SF-36 Social functioning

|                   |      |      |      |      |      |    |        |                      |
|-------------------|------|------|------|------|------|----|--------|----------------------|
| Chang 2012        | 89   | 14.1 | 352  | 67.6 | 21.7 | 22 | 17.7%  | 21.40 [12.21, 30.59] |
| Jurschik 2012     | 87.5 | 21.3 | 473  | 59.6 | 3.9  | 50 | 22.1%  | 27.90 [25.70, 30.10] |
| Lenardt 2014      | 89   | 25   | 164  | 85.6 | 25.6 | 39 | 18.0%  | 3.40 [-5.50, 12.30]  |
| Lin 2011          | 93.8 | 24.2 | 841  | 80.2 | 17.2 | 92 | 21.4%  | 13.60 [9.72, 17.48]  |
| Masel 2009        | 77.1 | 28.8 | 811  | 47.8 | 33.8 | 20 | 20.8%  | 29.30 [24.21, 34.39] |
| Subtotal (95% CI) |      |      | 2641 |      |      | 40 | 100.0% | 19.57 [11.12, 28.02] |

Heterogeneity:  $\tau^2 = 82.91$ ;  $\chi^2 = 64.74$ ,  $df = 4$  ( $P < 0.00001$ );  $I^2 = 94\%$

Test for overall effect:  $Z = 4.54$  ( $P < 0.00001$ )

#### SF-36 Role—Emotional

|                   |      |      |      |      |      |    |        |                      |
|-------------------|------|------|------|------|------|----|--------|----------------------|
| Chang 2012        | 89.1 | 28.7 | 352  | 71.2 | 44   | 22 | 16.3%  | 17.90 [-0.73, 36.53] |
| Jurschik 2012     | 87.7 | 29.8 | 473  | 54.4 | 48.4 | 50 | 19.1%  | 33.30 [19.62, 46.98] |
| Lenardt 2014      | 88.4 | 30.9 | 164  | 81.1 | 36.5 | 39 | 19.8%  | 7.30 [-5.09, 19.69]  |
| Lin 2011          | 90.9 | 44.2 | 841  | 85.9 | 31.5 | 92 | 22.4%  | 5.00 [-2.10, 12.10]  |
| Masel 2009        | 83.5 | 35.9 | 811  | 52.8 | 48.3 | 20 | 22.4%  | 30.70 [23.56, 37.84] |
| Subtotal (95% CI) |      |      | 2641 |      |      | 40 | 100.0% | 18.72 [5.35, 32.09]  |

Heterogeneity:  $\tau^2 = 194.81$ ;  $\chi^2 = 32.73$ ,  $df = 4$  ( $P < 0.00001$ );  $I^2 = 88\%$

Test for overall effect:  $Z = 2.74$  ( $P = 0.006$ )

#### SF-36 Mental health

|               |      |      |     |      |      |    |       |                      |
|---------------|------|------|-----|------|------|----|-------|----------------------|
| Chang 2012    | 79.3 | 14.4 | 352 | 67.5 | 17.3 | 22 | 17.3% | 11.80 [4.42, 19.18]  |
| Jurschik 2012 | 73.9 | 22.2 | 473 | 54.6 | 29.7 | 50 | 15.1% | 19.30 [10.83, 27.77] |
| Lenardt 2014  | 80.1 | 21.7 | 164 | 76.4 | 23.4 | 39 | 15.9% | 3.70 [-4.36, 11.76]  |
| Lin 2011      | 81   | 26.5 | 841 | 73.7 | 18.9 | 92 | 24.6% | 7.30 [3.04, 11.56]   |

|                   |      |      |      |      |      |     |        |                      |
|-------------------|------|------|------|------|------|-----|--------|----------------------|
| Masel 2009        | 80.2 | 18.5 | 811  | 66.2 | 21.4 | 200 | 27.1%  | 14.00 [10.77, 17.23] |
| Subtotal (95% CI) |      |      | 2641 |      |      | 403 | 100.0% | 11.13 [6.56, 15.71]  |

Heterogeneity: Tau<sup>2</sup> = 17.39; Chi<sup>2</sup> = 12.90, df = 4 (P = 0.01); I<sup>2</sup> = 69%

Test for overall effect: Z = 4.77 (P < 0.00001)

#### SF-36 Physical Component Summary

|                   |      |      |      |      |     |     |        |                    |
|-------------------|------|------|------|------|-----|-----|--------|--------------------|
| Chang 2012        | 48.5 | 8.3  | 352  | 39.5 | 7.8 | 22  | 22.5%  | 9.00 [5.63, 12.37] |
| Lin 2011          | 49.3 | 10.6 | 841  | 42.6 | 7.6 | 92  | 38.2%  | 6.70 [4.99, 8.41]  |
| Masel 2009        | 38.8 | 12   | 811  | 29.1 | 9.9 | 200 | 39.3%  | 9.70 [8.10, 11.30] |
| Subtotal (95% CI) |      |      | 2004 |      |     | 314 | 100.0% | 8.40 [6.24, 10.55] |

Heterogeneity: Tau<sup>2</sup> = 2.40; Chi<sup>2</sup> = 6.45, df = 2 (P = 0.04); I<sup>2</sup> = 69%

Test for overall effect: Z = 7.64 (P < 0.00001)

#### SF-36 Mental Component Summary

|                   |      |      |      |      |      |     |        |                     |
|-------------------|------|------|------|------|------|-----|--------|---------------------|
| Chang 2012        | 53.6 | 8.7  | 352  | 43.3 | 12.3 | 22  | 26.9%  | 10.30 [5.08, 15.52] |
| Lin 2011          | 55.4 | 12.4 | 841  | 52.6 | 8.8  | 92  | 36.5%  | 2.80 [0.82, 4.78]   |
| Masel 2009        | 55.8 | 9.7  | 811  | 46.9 | 12.7 | 200 | 36.7%  | 8.90 [7.02, 10.78]  |
| Subtotal (95% CI) |      |      | 2004 |      |      | 314 | 100.0% | 7.05 [2.18, 11.93]  |

Heterogeneity: Tau<sup>2</sup> = 15.95; Chi<sup>2</sup> = 21.54, df = 2 (P < 0.0001); I<sup>2</sup> = 91%

Test for overall effect: Z = 2.83 (P = 0.005)

#### WHOQOL-BREF Physical

|                   |      |      |     |      |      |     |        |                      |
|-------------------|------|------|-----|------|------|-----|--------|----------------------|
| Chang 2016        | 60.9 | 13.3 | 161 | 43.5 | 13.5 | 78  | 24.4%  | 17.40 [13.77, 21.03] |
| Gobbens 2013      | 79.3 | 11.4 | 745 | 60.1 | 14.7 | 286 | 67.4%  | 19.20 [17.31, 21.09] |
| Kanauchi 2008     | 66.3 | 13.2 | 77  | 51.8 | 14.7 | 24  | 8.2%   | 14.50 [7.92, 21.08]  |
| Subtotal (95% CI) |      |      | 983 |      |      | 388 | 100.0% | 18.38 [16.46, 20.30] |

Heterogeneity: Tau<sup>2</sup> = 0.49; Chi<sup>2</sup> = 2.30, df = 2 (P = 0.32); I<sup>2</sup> = 13%

Test for overall effect: Z = 18.75 (P < 0.00001)

#### WHOQOL-BREF Psychological

|                   |      |      |     |      |      |     |        |                      |
|-------------------|------|------|-----|------|------|-----|--------|----------------------|
| Chang 2016        | 65.8 | 10.1 | 161 | 48.8 | 13   | 78  | 35.5%  | 17.00 [13.72, 20.28] |
| Gobbens 2013      | 69.1 | 10.8 | 745 | 58.3 | 11.6 | 286 | 41.3%  | 10.80 [9.25, 12.35]  |
| Kanauchi 2008     | 65.2 | 13.4 | 77  | 52.7 | 14.5 | 24  | 23.1%  | 12.50 [5.97, 19.03]  |
| Subtotal (95% CI) |      |      | 983 |      |      | 388 | 100.0% | 13.40 [8.80, 17.99]  |

Heterogeneity: Tau<sup>2</sup> = 12.66; Chi<sup>2</sup> = 11.24, df = 2 (P = 0.004); I<sup>2</sup> = 82%

Test for overall effect: Z = 5.72 (P < 0.00001)

#### WHOQOL-BREF Social

|                   |      |      |     |      |      |     |        |                      |
|-------------------|------|------|-----|------|------|-----|--------|----------------------|
| Chang 2016        | 63.8 | 10.3 | 161 | 55.8 | 10.5 | 78  | 39.1%  | 8.00 [5.18, 10.82]   |
| Gobbens 2013      | 69.3 | 14.3 | 745 | 56.9 | 16.1 | 286 | 42.2%  | 12.40 [10.27, 14.53] |
| Kanauchi 2008     | 57.3 | 15.8 | 77  | 53.6 | 17   | 24  | 18.7%  | 3.70 [-3.96, 11.36]  |
| Subtotal (95% CI) |      |      | 983 |      |      | 388 | 100.0% | 9.06 [4.80, 13.31]   |

8 %

Heterogeneity:  $\tau^2 = 9.99$ ;  $\chi^2 = 9.10$ ,  $df = 2$  ( $P = 0.01$ );  $I^2 = 78\%$

Test for overall effect:  $Z = 4.17$  ( $P < 0.0001$ )

#### WHOQOL-BREF Environment

|                   |      |      |     |      |      |    |        |                     |
|-------------------|------|------|-----|------|------|----|--------|---------------------|
| Chang 2016        | 65.6 | 7.9  | 161 | 58   | 9.5  | 78 | 38.7%  | 7.60 [5.16, 10.04]  |
| Gobbens 2013      | 76.4 | 11.1 | 745 | 66.1 | 12.8 | 28 | 49.4%  | 10.30 [8.62, 11.98] |
| Kanauchi 2008     | 64.8 | 9    | 77  | 52.1 | 14.6 | 24 | 11.9%  | 12.70 [6.52, 18.88] |
| Subtotal (95% CI) |      |      | 983 |      |      | 38 | 100.0% | 9.54 [7.19, 11.89]  |
|                   |      |      |     |      |      | 8  |        |                     |

Heterogeneity:  $\tau^2 = 2.16$ ;  $\chi^2 = 4.22$ ,  $df = 2$  ( $P = 0.12$ );  $I^2 = 53\%$

Test for overall effect:  $Z = 7.96$  ( $P < 0.00001$ )

#### CASP-19 Total

|                     |      |     |      |      |     |    |        |                      |
|---------------------|------|-----|------|------|-----|----|--------|----------------------|
| ELSA (Hubbard 2014) | 44.6 | 8.4 | 2778 | 33.6 | 9.5 | 42 | 54.9%  | 11.00 [10.05, 11.95] |
| Wu 2013             | 38.3 | 7   | 682  | 34.1 | 8.9 | 17 | 45.1%  | 4.20 [-0.06, 8.46]   |
| Subtotal (95% CI)   |      |     | 3460 |      |     | 44 | 100.0% | 7.93 [1.30, 14.56]   |
|                     |      |     |      |      |     | 5  |        |                      |

Heterogeneity:  $\tau^2 = 20.64$ ;  $\chi^2 = 9.31$ ,  $df = 1$  ( $P = 0.002$ );  $I^2 = 89\%$

Test for overall effect:  $Z = 2.34$  ( $P = 0.02$ )

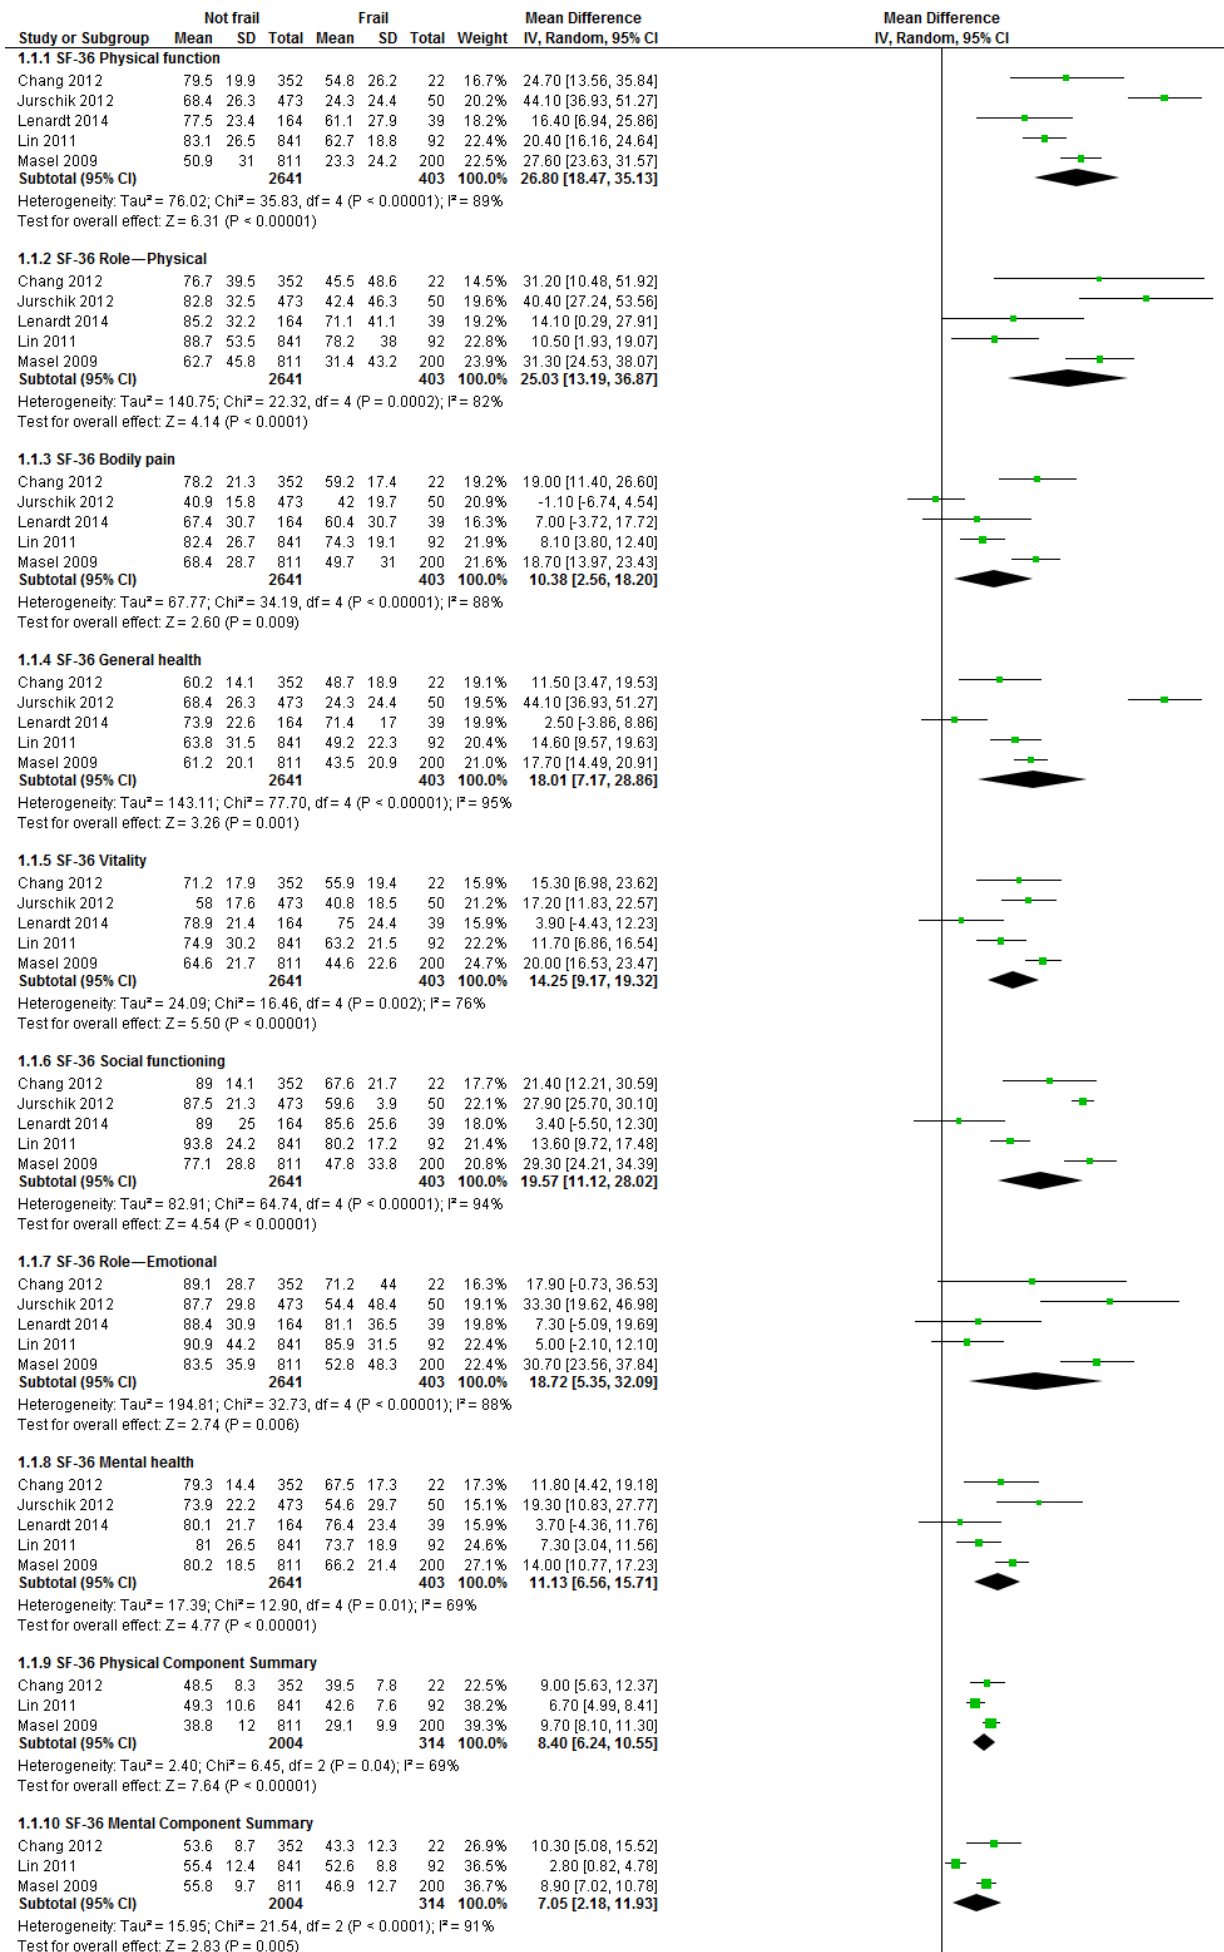

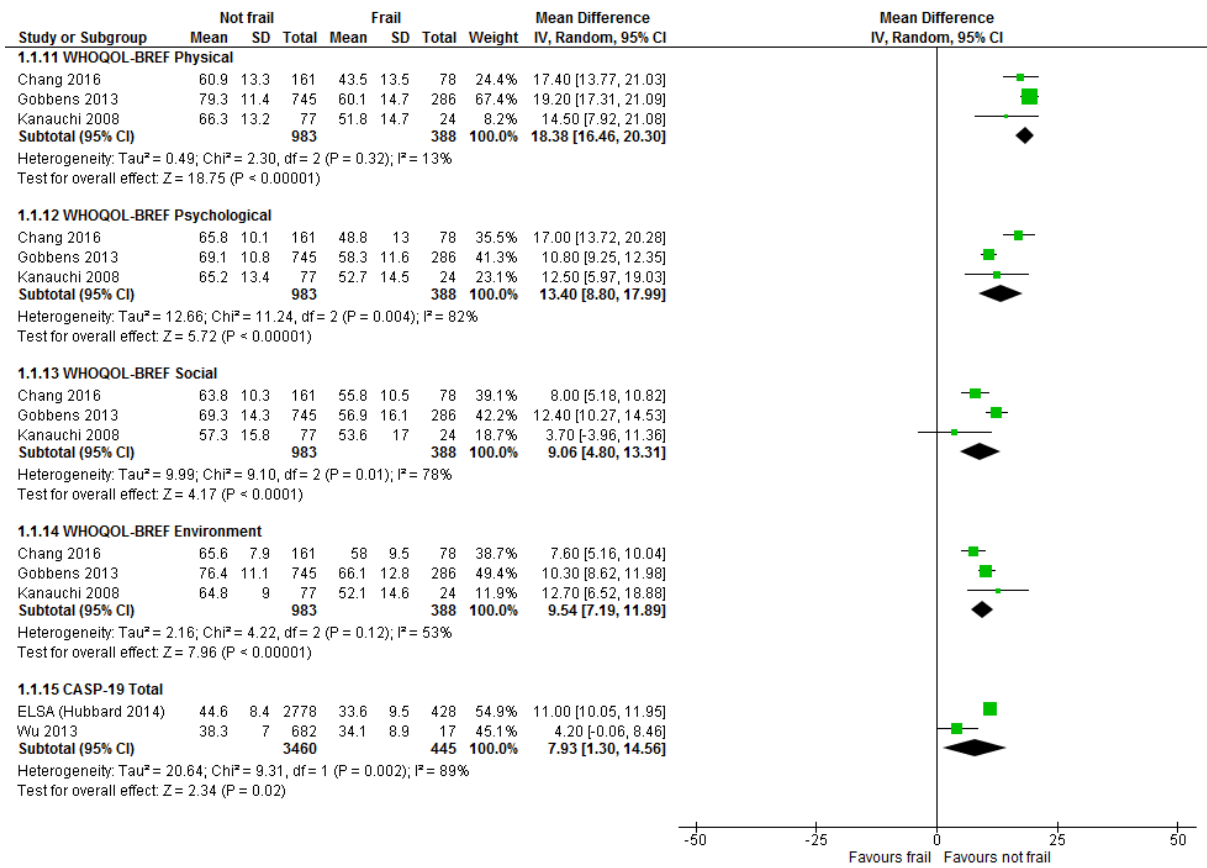

Supplement: MOESM6 [file 16550646]
