# Supplementary material for: Quality of life is substantially worse for community-dwelling older people living with frailty: systematic review and meta-analysis
Source: PubMed Central journal article supplement (PMC6620381; doi:10.1007/s11136-019-02149-1), 2019-03-14
Supplement: 11136_2019_2149_MOESM5_ESM.pdf [file 11136_2019_2149_MOESM5_ESM.pdf]

## Pooled standardised mean differences for QOL measures for people with and without frailty

| Measure / study                                                                                              | Not frail |      |      | Frail |      |     | Weight | Mean difference<br>IV, random, 95% C |
|--------------------------------------------------------------------------------------------------------------|-----------|------|------|-------|------|-----|--------|--------------------------------------|
|                                                                                                              | Mean      | SD   | N    | Mean  | SD   | N   |        |                                      |
| <b>SF-36 Physical function</b>                                                                               |           |      |      |       |      |     |        |                                      |
| Chang 2012                                                                                                   | 79.5      | 19.9 | 352  | 54.8  | 26.2 | 22  | 16.6%  | 1.21 [0.77, 1.65]                    |
| Jurschik 2012                                                                                                | 68.4      | 26.3 | 473  | 24.3  | 24.4 | 50  | 19.8%  | 1.69 [1.38, 1.99]                    |
| Lenardt 2014                                                                                                 | 77.5      | 23.4 | 164  | 61.1  | 27.9 | 39  | 18.7%  | 0.67 [0.32, 1.03]                    |
| Lin 2011                                                                                                     | 83.1      | 26.5 | 841  | 62.7  | 18.8 | 92  | 21.9%  | 0.79 [0.57, 1.01]                    |
| Masel 2009                                                                                                   | 50.9      | 31   | 811  | 23.3  | 24.2 | 200 | 23.0%  | 0.93 [0.77, 1.09]                    |
| Subtotal (95% CI)                                                                                            |           |      | 2641 |       |      | 403 | 100.0% | 1.05 [0.73, 1.36]                    |
| Heterogeneity: Tau <sup>2</sup> = 0.11; Chi <sup>2</sup> = 27.39, df = 4 (P < 0.0001); I <sup>2</sup> = 85%  |           |      |      |       |      |     |        |                                      |
| Test for overall effect: Z = 6.51 (P < 0.00001)                                                              |           |      |      |       |      |     |        |                                      |
| <b>SF-36 Role—Physical</b>                                                                                   |           |      |      |       |      |     |        |                                      |
| Chang 2012                                                                                                   | 76.7      | 39.5 | 352  | 45.5  | 48.6 | 22  | 16.9%  | 0.78 [0.34, 1.21]                    |
| Jurschik 2012                                                                                                | 82.8      | 32.5 | 473  | 42.4  | 46.3 | 50  | 19.9%  | 1.19 [0.88, 1.49]                    |
| Lenardt 2014                                                                                                 | 85.2      | 32.4 | 164  | 71.1  | 41.1 | 39  | 18.8%  | 0.41 [0.06, 0.76]                    |
| Lin 2011                                                                                                     | 88.7      | 53.5 | 841  | 78.2  | 38   | 92  | 21.7%  | 0.20 [-0.01, 0.42]                   |
| Masel 2009                                                                                                   | 62.7      | 45.8 | 811  | 31.4  | 43.2 | 200 | 22.7%  | 0.69 [0.53, 0.85]                    |
| Subtotal (95% CI)                                                                                            |           |      | 2641 |       |      | 403 | 100.0% | 0.64 [0.32, 0.97]                    |
| Heterogeneity: Tau <sup>2</sup> = 0.12; Chi <sup>2</sup> = 30.75, df = 4 (P < 0.00001); I <sup>2</sup> = 87% |           |      |      |       |      |     |        |                                      |
| Test for overall effect: Z = 3.86 (P = 0.0001)                                                               |           |      |      |       |      |     |        |                                      |
| <b>SF-36 Bodily pain</b>                                                                                     |           |      |      |       |      |     |        |                                      |
| Chang 2012                                                                                                   | 78.2      | 21.3 | 352  | 59.2  | 17.4 | 22  | 16.1%  | 0.90 [0.46, 1.33]                    |
| Jurschik 2012                                                                                                | 40.9      | 15.8 | 473  | 42    | 19.7 | 50  | 20.1%  | -0.07 [-0.36, 0.22]                  |
| Lenardt 2014                                                                                                 | 67.4      | 30.7 | 164  | 60.4  | 30.7 | 39  | 18.5%  | 0.23 [-0.12, 0.58]                   |
| Lin 2011                                                                                                     | 82.4      | 26.7 | 841  | 74.3  | 19.1 | 92  | 22.0%  | 0.31 [0.09, 0.53]                    |
| Masel 2009                                                                                                   | 68.4      | 28.7 | 811  | 49.7  | 31   | 200 | 23.3%  | 0.64 [0.48, 0.80]                    |
| Subtotal (95% CI)                                                                                            |           |      | 2641 |       |      | 403 | 100.0% | 0.39 [0.10, 0.69]                    |
| Heterogeneity: Tau <sup>2</sup> = 0.09; Chi <sup>2</sup> = 24.97, df = 4 (P < 0.0001); I <sup>2</sup> = 84%  |           |      |      |       |      |     |        |                                      |
| Test for overall effect: Z = 2.60 (P = 0.009)                                                                |           |      |      |       |      |     |        |                                      |
| <b>SF-36 General health</b>                                                                                  |           |      |      |       |      |     |        |                                      |
| Chang 2012                                                                                                   | 60.2      | 14.1 | 352  | 48.7  | 18.9 | 22  | 18.2%  | 0.80 [0.36, 1.23]                    |
| Jurschik 2012                                                                                                | 68.4      | 26.3 | 473  | 24.3  | 24.4 | 50  | 19.9%  | 1.69 [1.38, 1.99]                    |
| Lenardt 2014                                                                                                 | 73.9      | 22.6 | 164  | 71.4  | 17   | 39  | 19.4%  | 0.12 [-0.23, 0.46]                   |
| Lin 2011                                                                                                     | 63.8      | 31.5 | 841  | 49.2  | 22.3 | 92  | 21.0%  | 0.47 [0.26, 0.69]                    |
| Masel 2009                                                                                                   | 61.2      | 20.1 | 811  | 43.5  | 20.9 | 200 | 21.5%  | 0.87 [0.71, 1.03]                    |
| Subtotal (95% CI)                                                                                            |           |      | 2641 |       |      | 403 | 100.0% | 0.79 [0.35, 1.23]                    |
| Heterogeneity: Tau <sup>2</sup> = 0.23; Chi <sup>2</sup> = 55.80, df = 4 (P < 0.00001); I <sup>2</sup> = 93% |           |      |      |       |      |     |        |                                      |
| Test for overall effect: Z = 3.51 (P = 0.0005)                                                               |           |      |      |       |      |     |        |                                      |

### SF-36 Vitality

|                   |      |      |      |      |      |     |        |                    |
|-------------------|------|------|------|------|------|-----|--------|--------------------|
| Chang 2012        | 71.2 | 17.9 | 352  | 55.9 | 19.4 | 22  | 16.4%  | 0.85 [0.41, 1.28]  |
| Jurschik 2012     | 58   | 17.6 | 473  | 40.8 | 18.5 | 50  | 20.0%  | 0.97 [0.67, 1.27]  |
| Lenardt 2014      | 78.9 | 21.4 | 164  | 75   | 24.4 | 39  | 18.6%  | 0.18 [-0.17, 0.53] |
| Lin 2011          | 74.9 | 30.2 | 841  | 63.2 | 21.5 | 92  | 21.9%  | 0.40 [0.18, 0.61]  |
| Masel 2009        | 64.6 | 21.7 | 811  | 44.6 | 22.6 | 200 | 23.1%  | 0.91 [0.75, 1.07]  |
| Subtotal (95% CI) |      |      | 2641 |      |      | 403 | 100.0% | 0.66 [0.36, 0.97]  |

Heterogeneity:  $\text{Tau}^2 = 0.10$ ;  $\text{Chi}^2 = 26.58$ ,  $\text{df} = 4$  ( $P < 0.0001$ );  $I^2 = 85\%$

Test for overall effect:  $Z = 4.25$  ( $P < 0.0001$ )

### SF-36 Social functioning

|                   |      |      |      |      |      |     |        |                    |
|-------------------|------|------|------|------|------|-----|--------|--------------------|
| Chang 2012        | 89   | 14.1 | 352  | 67.6 | 21.7 | 22  | 17.4%  | 1.46 [1.02, 1.90]  |
| Jurschik 2012     | 87.5 | 21.3 | 473  | 59.6 | 23.9 | 50  | 20.0%  | 1.29 [0.99, 1.59]  |
| Lenardt 2014      | 89   | 25   | 164  | 85.6 | 25.6 | 39  | 19.2%  | 0.13 [-0.21, 0.48] |
| Lin 2011          | 93.8 | 24.2 | 841  | 80.2 | 17.2 | 92  | 21.3%  | 0.58 [0.36, 0.79]  |
| Masel 2009        | 77.1 | 28.8 | 811  | 47.8 | 33.8 | 200 | 22.0%  | 0.98 [0.82, 1.14]  |
| Subtotal (95% CI) |      |      | 2641 |      |      | 403 | 100.0% | 0.88 [0.50, 1.25]  |

Heterogeneity:  $\text{Tau}^2 = 0.16$ ;  $\text{Chi}^2 = 40.21$ ,  $\text{df} = 4$  ( $P < 0.00001$ );  $I^2 = 90\%$

Test for overall effect:  $Z = 4.57$  ( $P < 0.00001$ )

### SF-36 Role—Emotional

|                   |      |      |      |      |      |     |        |                    |
|-------------------|------|------|------|------|------|-----|--------|--------------------|
| Chang 2012        | 89.1 | 28.7 | 352  | 71.2 | 44   | 22  | 17.4%  | 0.60 [0.17, 1.03]  |
| Jurschik 2012     | 87.7 | 29.8 | 473  | 54.4 | 48.4 | 50  | 20.0%  | 1.04 [0.74, 1.34]  |
| Lenardt 2014      | 88.4 | 30.9 | 164  | 81.1 | 36.5 | 39  | 19.0%  | 0.23 [-0.12, 0.58] |
| Lin 2011          | 90.9 | 44.2 | 841  | 85.9 | 31.5 | 92  | 21.4%  | 0.12 [-0.10, 0.33] |
| Masel 2009        | 83.5 | 35.9 | 811  | 52.8 | 48.3 | 200 | 22.2%  | 0.79 [0.63, 0.95]  |
| Subtotal (95% CI) |      |      | 2641 |      |      | 403 | 100.0% | 0.56 [0.19, 0.92]  |

Heterogeneity:  $\text{Tau}^2 = 0.15$ ;  $\text{Chi}^2 = 37.79$ ,  $\text{df} = 4$  ( $P < 0.00001$ );  $I^2 = 89\%$

Test for overall effect:  $Z = 3.01$  ( $P = 0.003$ )

### SF-36 Mental health

|                   |      |      |      |      |      |     |        |                    |
|-------------------|------|------|------|------|------|-----|--------|--------------------|
| Chang 2012        | 79.3 | 14.4 | 352  | 67.5 | 17.3 | 22  | 15.5%  | 0.81 [0.37, 1.24]  |
| Jurschik 2012     | 73.9 | 22.2 | 473  | 54.6 | 29.7 | 50  | 19.9%  | 0.84 [0.54, 1.13]  |
| Lenardt 2014      | 80.1 | 21.7 | 164  | 76.4 | 23.4 | 39  | 18.1%  | 0.17 [-0.18, 0.52] |
| Lin 2011          | 81   | 26.5 | 841  | 73.7 | 18.9 | 92  | 22.4%  | 0.28 [0.07, 0.50]  |
| Masel 2009        | 80.2 | 18.5 | 811  | 66.2 | 21.4 | 200 | 24.1%  | 0.73 [0.57, 0.89]  |
| Subtotal (95% CI) |      |      | 2641 |      |      | 403 | 100.0% | 0.56 [0.29, 0.83]  |

Heterogeneity:  $\text{Tau}^2 = 0.07$ ;  $\text{Chi}^2 = 20.21$ ,  $\text{df} = 4$  ( $P = 0.0005$ );  $I^2 = 80\%$

Test for overall effect:  $Z = 4.13$  ( $P < 0.0001$ )

#### SF-36 Physical Component Summary

|                   |      |      |      |      |     |     |        |                   |
|-------------------|------|------|------|------|-----|-----|--------|-------------------|
| Chang 2012        | 48.5 | 8.3  | 352  | 39.5 | 7.8 | 22  | 14.8%  | 1.09 [0.65, 1.52] |
| Lin 2011          | 49.3 | 10.6 | 841  | 42.6 | 7.6 | 92  | 37.1%  | 0.65 [0.43, 0.86] |
| Masel 2009        | 38.8 | 12   | 811  | 29.1 | 9.9 | 200 | 48.1%  | 0.83 [0.68, 0.99] |
| Subtotal (95% CI) |      |      | 2004 |      |     | 314 | 100.0% | 0.80 [0.61, 0.99] |

Heterogeneity:  $\tau^2 = 0.01$ ;  $\chi^2 = 3.71$ ,  $df = 2$  ( $P = 0.16$ );  $I^2 = 46\%$

Test for overall effect:  $Z = 8.33$  ( $P < 0.00001$ )

#### SF-36 Mental Component Summary

|                   |      |      |      |      |      |     |        |                   |
|-------------------|------|------|------|------|------|-----|--------|-------------------|
| Chang 2012        | 53.6 | 8.7  | 352  | 43.3 | 12.3 | 22  | 29.1%  | 1.15 [0.71, 1.59] |
| Lin 2011          | 55.4 | 12.4 | 841  | 52.6 | 8.8  | 92  | 34.9%  | 0.23 [0.02, 0.45] |
| Masel 2009        | 55.8 | 9.7  | 811  | 46.9 | 12.7 | 200 | 36.0%  | 0.86 [0.70, 1.02] |
| Subtotal (95% CI) |      |      | 2004 |      |      | 314 | 100.0% | 0.72 [0.22, 1.23] |

Heterogeneity:  $\tau^2 = 0.18$ ;  $\chi^2 = 25.88$ ,  $df = 2$  ( $P < 0.00001$ );  $I^2 = 92\%$

Test for overall effect:  $Z = 2.82$  ( $P = 0.005$ )

#### WHOQOL-BREF Physical

|                   |      |      |     |      |      |     |        |                   |
|-------------------|------|------|-----|------|------|-----|--------|-------------------|
| Chang 2016        | 60.9 | 13.3 | 161 | 43.5 | 13.5 | 78  | 33.0%  | 1.30 [1.00, 1.59] |
| Gobbens 2013      | 79.3 | 11.4 | 745 | 60.1 | 14.7 | 286 | 47.5%  | 1.55 [1.40, 1.70] |
| Kanauchi 2008     | 66.3 | 13.2 | 77  | 51.8 | 14.7 | 24  | 19.5%  | 1.06 [0.58, 1.54] |
| Subtotal (95% CI) |      |      | 983 |      |      | 388 | 100.0% | 1.37 [1.11, 1.63] |

Heterogeneity:  $\tau^2 = 0.03$ ;  $\chi^2 = 5.06$ ,  $df = 2$  ( $P = 0.08$ );  $I^2 = 60\%$

Test for overall effect:  $Z = 10.20$  ( $P < 0.00001$ )

#### WHOQOL-BREF Psychological

|                   |      |      |     |      |      |     |        |                   |
|-------------------|------|------|-----|------|------|-----|--------|-------------------|
| Chang 2016        | 65.8 | 10.1 | 161 | 48.8 | 13   | 78  | 33.8%  | 1.52 [1.22, 1.83] |
| Gobbens 2013      | 69.1 | 10.8 | 745 | 58.3 | 11.6 | 286 | 40.4%  | 0.98 [0.84, 1.12] |
| Kanauchi 2008     | 65.2 | 13.4 | 77  | 52.7 | 14.5 | 24  | 25.9%  | 0.91 [0.43, 1.38] |
| Subtotal (95% CI) |      |      | 983 |      |      | 388 | 100.0% | 1.14 [0.76, 1.53] |

Heterogeneity:  $\tau^2 = 0.09$ ;  $\chi^2 = 10.58$ ,  $df = 2$  ( $P = 0.005$ );  $I^2 = 81\%$

Test for overall effect:  $Z = 5.83$  ( $P < 0.00001$ )

#### WHOQOL-BREF Social

|                   |      |      |     |      |      |     |        |                    |
|-------------------|------|------|-----|------|------|-----|--------|--------------------|
| Chang 2016        | 63.8 | 10.3 | 161 | 55.8 | 10.5 | 78  | 33.6%  | 0.77 [0.49, 1.05]  |
| Gobbens 2013      | 69.3 | 14.3 | 745 | 56.9 | 16.1 | 286 | 45.2%  | 0.84 [0.70, 0.98]  |
| Kanauchi 2008     | 57.3 | 15.8 | 77  | 53.6 | 17   | 24  | 21.2%  | 0.23 [-0.23, 0.69] |
| Subtotal (95% CI) |      |      | 983 |      |      | 388 | 100.0% | 0.68 [0.41, 0.96]  |

Heterogeneity:  $\tau^2 = 0.04$ ;  $\chi^2 = 6.16$ ,  $df = 2$  ( $P = 0.05$ );  $I^2 = 68\%$

Test for overall effect:  $Z = 4.85$  ( $P < 0.00001$ )

#### WHOQOL-BREF Environment

|                   |      |      |     |      |      |     |        |                   |
|-------------------|------|------|-----|------|------|-----|--------|-------------------|
| Chang 2016        | 65.6 | 7.9  | 161 | 58   | 9.5  | 78  | 18.8%  | 0.90 [0.61, 1.18] |
| Gobbens 2013      | 76.4 | 11.1 | 745 | 66.1 | 12.8 | 286 | 74.8%  | 0.89 [0.75, 1.03] |
| Kanauchi 2008     | 64.8 | 9    | 77  | 52.1 | 14.6 | 24  | 6.3%   | 1.19 [0.70, 1.68] |
| Subtotal (95% CI) |      |      | 983 |      |      | 388 | 100.0% | 0.91 [0.79, 1.03] |

Heterogeneity: Tau<sup>2</sup> = 0.00; Chi<sup>2</sup> = 1.39, df = 2 (P = 0.50); I<sup>2</sup> = 0%

Test for overall effect: Z = 14.53 (P < 0.00001)

#### CASP-19 Total

|                     |      |     |      |      |     |     |        |                   |
|---------------------|------|-----|------|------|-----|-----|--------|-------------------|
| ELSA (Hubbard 2014) | 44.6 | 8.4 | 2778 | 33.6 | 9.5 | 428 | 56.0%  | 1.29 [1.18, 1.39] |
| Wu 2013             | 38.3 | 7   | 682  | 34.1 | 8.9 | 17  | 44.0%  | 0.60 [0.11, 1.08] |
| Subtotal (95% CI)   |      |     | 3460 |      |     | 445 | 100.0% | 0.98 [0.31, 1.65] |

Heterogeneity: Tau<sup>2</sup> = 0.21; Chi<sup>2</sup> = 7.51, df = 1 (P = 0.006); I<sup>2</sup> = 87%

Test for overall effect: Z = 2.87 (P = 0.004)

#### CASP-19 Control

|                   |     |     |     |     |     |    |        |                     |
|-------------------|-----|-----|-----|-----|-----|----|--------|---------------------|
| Wu 2013           | 6.7 | 1.5 | 682 | 7.1 | 2.6 | 17 | 100.0% | -0.26 [-0.74, 0.22] |
| Subtotal (95% CI) |     |     | 682 |     |     | 17 | 100.0% | -0.26 [-0.74, 0.22] |

Heterogeneity: Not applicable

Test for overall effect: Z = 1.06 (P = 0.29)

#### CASP-19 Autonomy

|                   |      |     |     |     |     |    |        |                   |
|-------------------|------|-----|-----|-----|-----|----|--------|-------------------|
| Wu 2013           | 10.7 | 1.9 | 682 | 9.1 | 2.8 | 17 | 100.0% | 0.83 [0.35, 1.31] |
| Subtotal (95% CI) |      |     | 682 |     |     | 17 | 100.0% | 0.83 [0.35, 1.31] |

Heterogeneity: Not applicable

Test for overall effect: Z = 3.37 (P = 0.0008)

#### CASP-19 Self-realisation

|                   |      |     |     |      |     |    |        |                    |
|-------------------|------|-----|-----|------|-----|----|--------|--------------------|
| Wu 2013           | 11.8 | 2.8 | 682 | 10.5 | 3.4 | 17 | 100.0% | 0.46 [-0.02, 0.94] |
| Subtotal (95% CI) |      |     | 682 |      |     | 17 | 100.0% | 0.46 [-0.02, 0.94] |

Heterogeneity: Not applicable

Test for overall effect: Z = 1.88 (P = 0.06)

#### CASP-19 C+A+S

|                   |      |     |      |      |      |     |        |                   |
|-------------------|------|-----|------|------|------|-----|--------|-------------------|
| ELSA (Gale 2014)  | 34.1 | 6.7 | 2244 | 28.6 | 6.22 | 313 | 100.0% | 0.83 [0.71, 0.95] |
| Subtotal (95% CI) |      |     | 2244 |      |      | 313 | 100.0% | 0.83 [0.71, 0.95] |

Heterogeneity: Not applicable

Test for overall effect: Z = 13.47 (P < 0.00001)

#### CASP-19 Pleasure

|                   |      |     |      |     |     |     |        |                   |
|-------------------|------|-----|------|-----|-----|-----|--------|-------------------|
| ELSA (Gale 2014)  | 10.4 | 1.7 | 2244 | 9.3 | 1.8 | 313 | 94.2%  | 0.64 [0.52, 0.76] |
| Wu 2013           | 8.9  | 2.8 | 682  | 7.4 | 2.5 | 17  | 5.8%   | 0.54 [0.05, 1.02] |
| Subtotal (95% CI) |      |     | 2926 |     |     | 330 | 100.0% | 0.64 [0.52, 0.75] |

Heterogeneity: Tau<sup>2</sup> = 0.00; Chi<sup>2</sup> = 0.17, df = 1 (P = 0.68); I<sup>2</sup> = 0%

Test for overall effect: Z = 10.74 (P < 0.00001)

#### OPQOL Total

|                   |       |      |     |       |      |    |        |                   |
|-------------------|-------|------|-----|-------|------|----|--------|-------------------|
| Bilotta 2010      | 120.2 | 14.5 | 161 | 107.4 | 12.6 | 78 | 100.0% | 0.92 [0.63, 1.20] |
| Subtotal (95% CI) |       |      | 161 |       |      | 78 | 100.0% | 0.92 [0.63, 1.20] |

Heterogeneity: Not applicable

Test for overall effect:  $Z = 6.36$  ( $P < 0.00001$ )

#### OPQOL Life overall

|                   |      |     |     |    |     |    |        |                   |
|-------------------|------|-----|-----|----|-----|----|--------|-------------------|
| Bilotta 2010      | 13.8 | 2.8 | 161 | 12 | 3.2 | 78 | 100.0% | 0.61 [0.34, 0.89] |
| Subtotal (95% CI) |      |     | 161 |    |     | 78 | 100.0% | 0.61 [0.34, 0.89] |

Heterogeneity: Not applicable

Test for overall effect:  $Z = 4.34$  ( $P < 0.0001$ )

#### OPQOL Health

|                   |      |   |     |     |     |    |        |                   |
|-------------------|------|---|-----|-----|-----|----|--------|-------------------|
| Bilotta 2010      | 11.6 | 3 | 161 | 8.2 | 2.8 | 78 | 100.0% | 1.15 [0.86, 1.44] |
| Subtotal (95% CI) |      |   | 161 |     |     | 78 | 100.0% | 1.15 [0.86, 1.44] |

Heterogeneity: Not applicable

Test for overall effect:  $Z = 7.81$  ( $P < 0.00001$ )

#### OPQOL Social

|                   |      |     |     |      |     |    |        |                    |
|-------------------|------|-----|-----|------|-----|----|--------|--------------------|
| Bilotta 2010      | 17.5 | 3.3 | 161 | 17.2 | 3.5 | 78 | 100.0% | 0.09 [-0.18, 0.36] |
| Subtotal (95% CI) |      |     | 161 |      |     | 78 | 100.0% | 0.09 [-0.18, 0.36] |

Heterogeneity: Not applicable

Test for overall effect:  $Z = 0.64$  ( $P = 0.52$ )

#### OPQOL Independence

|                   |      |     |     |      |     |    |        |                   |
|-------------------|------|-----|-----|------|-----|----|--------|-------------------|
| Bilotta 2010      | 13.2 | 3.1 | 161 | 10.7 | 2.8 | 78 | 100.0% | 0.83 [0.55, 1.11] |
| Subtotal (95% CI) |      |     | 161 |      |     | 78 | 100.0% | 0.83 [0.55, 1.11] |

Heterogeneity: Not applicable

Test for overall effect:  $Z = 5.79$  ( $P < 0.00001$ )

#### OPQOL Home

|                   |      |     |     |      |     |    |        |                   |
|-------------------|------|-----|-----|------|-----|----|--------|-------------------|
| Bilotta 2010      | 16.3 | 2.3 | 161 | 15.3 | 1.8 | 78 | 100.0% | 0.46 [0.19, 0.74] |
| Subtotal (95% CI) |      |     | 161 |      |     | 78 | 100.0% | 0.46 [0.19, 0.74] |

Heterogeneity: Not applicable

Test for overall effect:  $Z = 3.32$  ( $P = 0.0009$ )

#### OPQOL Psychological

|                   |      |     |     |      |     |    |        |                   |
|-------------------|------|-----|-----|------|-----|----|--------|-------------------|
| Bilotta 2010      | 14.3 | 2.8 | 161 | 12.6 | 2.6 | 78 | 100.0% | 0.62 [0.34, 0.90] |
| Subtotal (95% CI) |      |     | 161 |      |     | 78 | 100.0% | 0.62 [0.34, 0.90] |

Heterogeneity: Not applicable

Test for overall effect:  $Z = 4.40$  ( $P < 0.0001$ )

### OPQOL Finances

|                   |      |     |     |      |     |    |        |                    |
|-------------------|------|-----|-----|------|-----|----|--------|--------------------|
| Bilotta 2010      | 13.3 | 3.1 | 161 | 12.8 | 3.3 | 78 | 100.0% | 0.16 [-0.11, 0.43] |
| Subtotal (95% CI) |      |     | 161 |      |     | 78 | 100.0% | 0.16 [-0.11, 0.43] |

Heterogeneity: Not applicable

Test for overall effect:  $Z = 1.14$  ( $P = 0.25$ )

### OPQOL Activities

|                   |      |     |     |      |     |    |        |                   |
|-------------------|------|-----|-----|------|-----|----|--------|-------------------|
| Bilotta 2010      | 20.2 | 3.3 | 161 | 18.7 | 2.5 | 78 | 100.0% | 0.49 [0.21, 0.76] |
| Subtotal (95% CI) |      |     | 161 |      |     | 78 | 100.0% | 0.49 [0.21, 0.76] |

Heterogeneity: Not applicable

Test for overall effect:  $Z = 3.49$  ( $P = 0.0005$ )

### EQ-VAS

|                   |    |    |      |    |    |     |        |                   |
|-------------------|----|----|------|----|----|-----|--------|-------------------|
| Lahousse 2014     | 80 | 11 | 2670 | 70 | 15 | 163 | 100.0% | 0.89 [0.73, 1.05] |
| Subtotal (95% CI) |    |    | 2670 |    |    | 163 | 100.0% | 0.89 [0.73, 1.05] |

Heterogeneity: Not applicable

Test for overall effect:  $Z = 10.88$  ( $P < 0.00001$ )

### SWLS

|                   |      |     |    |      |     |    |        |                   |
|-------------------|------|-----|----|------|-----|----|--------|-------------------|
| Simone 2013       | 27.9 | 4.7 | 51 | 22.8 | 6.3 | 44 | 100.0% | 0.92 [0.50, 1.34] |
| Subtotal (95% CI) |      |     | 51 |      |     | 44 | 100.0% | 0.92 [0.50, 1.34] |

Heterogeneity: Not applicable

Test for overall effect:  $Z = 4.24$  ( $P < 0.0001$ )

Test for subgroup differences:  $\text{Chi}^2 = 133.04$ ,  $df = 30$  ( $P < 0.00001$ ),  $I^2 = 77.5\%$
