# Supplementary material for: Quality of life is substantially worse for community-dwelling older people living with frailty: systematic review and meta-analysis
Source: Qual Life Res. 2019 Mar 14;28(8):2041–56. doi: 10.1007/s11136-019-02149-1 (PMC6620381; doi:10.1007/s11136-019-02149-1)
Supplement: Supplementary file 2 — Supplementary material 2 (PDF 23 KB) [file 11136_2019_2149_MOESM2_ESM.pdf]

|                                                                                                                          |                                     |                                                     |                                                           |
|--------------------------------------------------------------------------------------------------------------------------|-------------------------------------|-----------------------------------------------------|-----------------------------------------------------------|
| Study name                                                                                                               |                                     |                                                     |                                                           |
| Reviewer                                                                                                                 |                                     |                                                     |                                                           |
| Papers                                                                                                                   |                                     |                                                     |                                                           |
| Extra data provided by author                                                                                            |                                     |                                                     |                                                           |
| Title of trial (if known)                                                                                                |                                     |                                                     |                                                           |
| Aims of study                                                                                                            |                                     |                                                     |                                                           |
| Links to other papers                                                                                                    |                                     |                                                     |                                                           |
| Study type                                                                                                               |                                     |                                                     |                                                           |
| Country                                                                                                                  |                                     |                                                     |                                                           |
| Setting (e.g. urban)                                                                                                     |                                     |                                                     |                                                           |
| Characterisation of participants                                                                                         |                                     |                                                     |                                                           |
| Years when reported data collected                                                                                       |                                     |                                                     |                                                           |
| Age: mean (SD)                                                                                                           |                                     |                                                     |                                                           |
| % female                                                                                                                 |                                     |                                                     |                                                           |
| Total in analysis                                                                                                        |                                     |                                                     |                                                           |
| Frailty ascertainment                                                                                                    |                                     |                                                     |                                                           |
| Quality of life instruments                                                                                              |                                     |                                                     |                                                           |
| Does the paper describe QOL instruments as measuring quality of life /well-being / life satisfaction?                    |                                     |                                                     |                                                           |
| <u>categories for N and Means</u>                                                                                        | <u>Fit (or robust) <sup>†</sup></u> | <u>Pre-frail (or mild frailty) <math>\pm</math></u> | <u>Frail (or moderate-severe frailty) <math>\S</math></u> |
| N: Not frail (Fit); pre frail; frail: number (% out of total population)                                                 |                                     |                                                     |                                                           |
| Quality of life data by frailty status. Report means, SDs, SEs, or median and interquartile or other descriptors if used |                                     |                                                     |                                                           |
| Reported associations between frailty and quality of life                                                                |                                     |                                                     |                                                           |

|                                                                                                                                                                                  |                 |                      |
|----------------------------------------------------------------------------------------------------------------------------------------------------------------------------------|-----------------|----------------------|
| statistical methods used to assess the data (e.g. hypothesis tests such as t-test or chi-test for assessing mean difference, or regression analysis and the type of model used). |                 |                      |
| Covariates adjusted for (if any)                                                                                                                                                 |                 |                      |
| Authors conclusions (just a couple of lines to summarise)                                                                                                                        |                 |                      |
| Additional information                                                                                                                                                           |                 |                      |
| Notable exclusions                                                                                                                                                               |                 |                      |
|                                                                                                                                                                                  |                 |                      |
| <u>Quality assessment</u>                                                                                                                                                        | <u>Decision</u> | <u>Justification</u> |
| Representativeness of the sample:                                                                                                                                                |                 |                      |
| Sample size:                                                                                                                                                                     |                 |                      |
| Non-respondents:                                                                                                                                                                 |                 |                      |
| Ascertainment of frailty:                                                                                                                                                        |                 |                      |
| The subjects in different outcome groups are comparable, based on the study design or analysis. Confounding factors are controlled.                                              |                 |                      |
| Assessment of the outcome:                                                                                                                                                       |                 |                      |
| Statistical test:                                                                                                                                                                |                 |                      |
