# Supplementary material for: Quality of life is substantially worse for community-dwelling older people living with frailty: systematic review and meta-analysis
Source: Qual Life Res. 2019 Mar 14;28(8):2041–56. doi: 10.1007/s11136-019-02149-1 (PMC6620381; doi:10.1007/s11136-019-02149-1)
Supplement: Supplementary file 3 — Supplementary material 3 (PDF 140 KB) [file 11136_2019_2149_MOESM3_ESM.pdf]

## Aids to interpretation of differences

### RULES OF THUMB FOR STANDARDIZED MEAN DIFFERENCES

Standardised mean differences developed from the original rules of thumb by Cohen (for small medium and large differences) . The rules of thumb are defined as point values, e.g. small = 0.2, which we have conservatively taken as the lower bounds for bins.

| Bin        | Lower boundary (d ≥) | Upper boundary (d <) |
|------------|----------------------|----------------------|
| very small | .01                  | .2                   |
| small      | .2                   | .5                   |
| medium     | .5                   | .8                   |
| large      | .8                   | 1.2                  |
| very large | 1.2                  | 2.0                  |
| huge       | 2.0                  | -                    |

  

### MEANINGFUL DIFFERENCES IN GENERAL POPULATIONS

#### Medical Outcomes Study 36-item Short-Form health survey (SF-36)

Mean differences in each sub-scale of the SF-36 between patients with minor vs. serious medical conditions in the Medical Outcomes Study (n=806)

| Sub-scale                       | Medical condition |         | Mean difference |
|---------------------------------|-------------------|---------|-----------------|
|                                 | Minor             | Serious |                 |
| Physical functioning (PF)       | 80.5              | 57.4    | 23.2            |
| Role-physical (RP)              | 70.3              | 43.9    | 26.4            |
| Bodily pain (BP)                | 76.1              | 65.1    | 11.0            |
| Mental Health (MH)              | 82.5              | 77.6    | 4.9             |
| Role-emotional (RE)             | 84.3              | 76.2    | 8.1             |
| Social functioning (SF)         | 91.6              | 80.0    | 11.6            |
| Vitality (VT)                   | 62.0              | 47.8    | 14.2            |
| General health perceptions (GH) | 67.0              | 49.1    | 17.9            |

Mean differences in summary scales of the SF-36 between the 25th and 75th percentile from a general sample (n=8,207)

| Component scale                        | 25 <sup>th</sup> percentile | 75 <sup>th</sup> percentile | Mean difference |
|----------------------------------------|-----------------------------|-----------------------------|-----------------|
| Physical component summary scale (PCS) | 47.1                        | 56.1                        | 9.1             |
| Mental component                       | 46.1                        | 57.0                        | 10.8            |

|                     |  |  |  |
|---------------------|--|--|--|
| summary scale (MCS) |  |  |  |
|---------------------|--|--|--|

## World Health Organisation Quality of Life short-form instrument (WHOQOL-BREF)

Mean differences between “well” and “sick” groups from a broad sample (n = 11,380) following a previous example

| Domain        | Well | Sick | Mean difference |
|---------------|------|------|-----------------|
| Physical      | 71.3 | 56.9 | 14.4            |
| Psychological | 67.5 | 60.6 | 6.9             |
| Social        | 67.5 | 62.5 | 5.0             |
| Environment   | 63.1 | 61.3 | 1.9             |

### References

- [1] Sawilowsky SS. New Effect Size Rules of Thumb. *Journal of Modern Applied Statistical Methods*. 2009;8(2):Article 26. doi: 10.22237/jmasm/1257035100.
- [2] McHorney CA, Ware JE, Raczek AE. The MOS 36-Item Short-Form Health Survey (SF-36): II. Psychometric and clinical tests of validity in measuring physical and mental health constructs. *Medical Care*. 1993;31(3):247-63.
- [3] Jenkinson C. The SF-36 Physical and Mental Health Summary Measures: An Example of How to Interpret Scores. *Journal of Health Services Research & Policy*. 1998;3(2):92-6. doi: 10.1177/135581969800300206.
- [4] Skevington SM, Lotfy M, O'Connell KA. The World Health Organization's WHOQOL-BREF quality of life assessment: psychometric properties and results of the international field trial. A report from the WHOQOL group. *Quality of Life Research*. 2004;13(2):299-310. doi: 10.1023/B:QURE.0000018486.91360.00.
- [5] Crocker TF, Smith JK, Skevington SM. Family and professionals underestimate quality of life across diverse cultures and health conditions: systematic review. *Journal of Clinical Epidemiology*. 2015;68(5):584-95. doi: 10.1016/j.jclinepi.2014.12.007.
