# Supplementary material for: Quality of life is substantially worse for community-dwelling older people living with frailty: systematic review and meta-analysis
Source: Qual Life Res. 2019 Mar 14;28(8):2041–56. doi: 10.1007/s11136-019-02149-1 (PMC6620381; doi:10.1007/s11136-019-02149-1)
Supplement: Supplementary file 4 — Supplementary material 4 (PDF 208 KB) [file 11136_2019_2149_MOESM4_ESM.pdf]

Online Resource 4 for “Quality of life is substantially worse for community-dwelling older people living with frailty: systematic review and meta-analysis”. *Quality of Life Research*. Crocker TF\*, Brown L, Clegg A, Farley K, Franklin M, Simpkins S, Young J. \* Bradford Teaching Hospitals NHS Foundation Trust; tom.crocker@bthft.nhs.uk

## DETAILS OF INCLUDED QUALITY OF LIFE INSTRUMENTS

| Measure name                                            | Construct according to developer(s)   | Number of items, direction <sup>†</sup> and item-scaling | Summary scores (operation <sup>‡</sup> ; range <sup>§</sup> ) | Sub-scales (operation <sup>‡</sup> ; range <sup>§</sup> )                                                                                                                                                                                                                 | Notes                                                                                                                                                                                                                                     |
|---------------------------------------------------------|---------------------------------------|----------------------------------------------------------|---------------------------------------------------------------|---------------------------------------------------------------------------------------------------------------------------------------------------------------------------------------------------------------------------------------------------------------------------|-------------------------------------------------------------------------------------------------------------------------------------------------------------------------------------------------------------------------------------------|
| CASP-19                                                 | QOL / needs satisfaction / well-being | 19 ↑<br>Likert 0 to 3                                    | Total ( $\Sigma$ : 0 to 57)                                   | Control ( $\Sigma$ : 0 to 12)<br>ability to intervene in one's environment<br>Autonomy ( $\Sigma$ : 0 to 15)<br>freedom from unwanted interference<br>Self-realization ( $\Sigma$ : 0 to 15)<br>actively being and growing<br>Pleasure ( $\Sigma$ : 0 to 15)<br>happiness | Following Steptoe et al., included study Gale 2014 combined the control, autonomy and self-realization scales of the CASP-19 as a “eudaimonic” scale, and renamed the pleasure scale “hedonic”.                                           |
| EQ-VAS                                                  | Self-rated health                     | 1 ↑<br>VAS 0 to 100                                      | Score (0 to 100)                                              | <i>None: one item only.</i>                                                                                                                                                                                                                                               | The EQ-VAS is part of the EuroQol 5-Dimension (EQ-5D) health questionnaire (not described in this document)                                                                                                                               |
| EUROHIS-QOL 8                                           | QOL                                   | 8 ↑<br>Likert 1 to 5                                     | Score ( $x$ : 1 to 5)                                         | <i>None</i>                                                                                                                                                                                                                                                               | The eight items of the EUROHIS-QOL 8 are drawn from the 26 items of the WHOQOL-BREF, including the overall assessment of QOL, overall assessment of health, two physical, one psychological, one social and two environment domain items. |
| Life satisfaction (Pinto 2016)                          | Life satisfaction                     | 6 ↑<br>Likert 1 to 4                                     | Score ( $\Sigma$ : 6 to 24)                                   | <i>None</i>                                                                                                                                                                                                                                                               | This unreferenced instrument has questions about satisfaction with life overall, friendship, environment, ability to do daily tasks, health services and means of transportation                                                          |
| Life satisfaction in 13 unspecified domains (Yang 2016) | Life satisfaction                     | 13 ↑<br>Likert 1 to 5                                    | Score ( $\Sigma$ : 13 to 65)                                  | <i>None</i>                                                                                                                                                                                                                                                               | This unreferenced instrument has questions on 13 unspecified domains. Sample items included “How satisfied are you with your health status?” and “How satisfied are you with your family relationships?”                                  |

| Measure name                                                     | Construct according to developer(s)       | Number of items, direction <sup>†</sup> and item-scaling                         | Summary scores (operation <sup>†</sup> : range <sup>§</sup> )                                                                                                                                                                                               | Sub-scales (operation <sup>†</sup> : range <sup>§</sup> )                                                                                                                                                                                                                                                                                     | Notes                                                                                |
|------------------------------------------------------------------|-------------------------------------------|----------------------------------------------------------------------------------|-------------------------------------------------------------------------------------------------------------------------------------------------------------------------------------------------------------------------------------------------------------|-----------------------------------------------------------------------------------------------------------------------------------------------------------------------------------------------------------------------------------------------------------------------------------------------------------------------------------------------|--------------------------------------------------------------------------------------|
| Life-Satisfaction<br>Terrible-Delightful<br>scale (St John 2013) | Individual well-being / Life satisfaction | 10 ↑<br>Likert 1 to 7                                                            | Health (1 to 7)<br>Finances (1 to 7)<br>Family relations (1 to 7)<br>Friendships (1 to 7)<br>Housing (1 to 7)<br>Recreation activity (1 to 7)<br>Spiritual fulfillment (1 to 7)<br>Self-esteem (1 to 7)<br>Transportation (1 to 7)<br>Life overall (1 to 7) | <i>None: each item is scored separately</i>                                                                                                                                                                                                                                                                                                   | The format is based on the Delighted-Terrible scale but the items have been changed. |
| OPQOL                                                            | QOL in older age                          | 35 ↑<br>Likert 1 to 5                                                            | Total (Σ: 35 to 175)                                                                                                                                                                                                                                        | Life overall (Σ: 4 to 20)<br>Health (Σ: 4 to 20)<br>Social relationships and participation (Σ: 5 to 25)<br>Independence, control over life, freedom (Σ: 4 to 20)<br>Area: home and neighbourhood (Σ: 4 to 20)<br>Psychological and emotional well-being (Σ: 4 to 20)<br>Financial circumstances (Σ: 4 to 20)<br>Religion/culture (Σ: 6 to 30) |                                                                                      |
| Quality of life overall (Ament 2014)                             | QOL                                       | 1 ↓<br>Five options coded: excellent, very good or good = 0; moderate or bad = 1 | Category (0 / 1)                                                                                                                                                                                                                                            | <i>None: one item only</i>                                                                                                                                                                                                                                                                                                                    | This unreferenced instrument has a single question about quality of life overall.    |

| Measure name                                            | Construct according to developer(s)           | Number of items, direction <sup>†</sup> and item-scaling                                                    | Summary scores (operation <sup>‡</sup> : range <sup>§</sup> )                                                         | Sub-scales (operation <sup>‡</sup> : range <sup>§</sup> )                                                                                                                                                                                                                                                                                                                                                                                                              | Notes                                                                                                                                                                                                |
|---------------------------------------------------------|-----------------------------------------------|-------------------------------------------------------------------------------------------------------------|-----------------------------------------------------------------------------------------------------------------------|------------------------------------------------------------------------------------------------------------------------------------------------------------------------------------------------------------------------------------------------------------------------------------------------------------------------------------------------------------------------------------------------------------------------------------------------------------------------|------------------------------------------------------------------------------------------------------------------------------------------------------------------------------------------------------|
| Ryff's Psychological Well-Being scale (18 item version) | Psychological well-being / general well-being | 18 ↑<br>Likert 1 to 6                                                                                       | Total (Σ: 18 to 108)                                                                                                  | Autonomy (Σ: 3 to 18)<br>independence and self-determination<br>Environmental mastery (Σ: 3 to 18)<br>ability to manage one's life<br>Personal growth (Σ: 3 to 18)<br>being open to new experiences<br>Positive relations with others (Σ: 3 to 18)<br>having satisfying high quality relationships<br>Purpose in life (Σ: 3 to 18)<br>believing that one's life is meaningful<br>Self-acceptance (Σ: 3 to 18)<br>positive attitude towards oneself and one's past life | In included report Andrew 2012 the scores are reversed so that greater scores equal worse well-being, but raw scores are not reported in this review as data was not presented in a suitable format. |
| SF-12                                                   | Health status / Health-related QOL            | 12 ↑<br>Between two and six response options. Each response has a particular weight for each summary score. | Physical Component Summary (PCS-12) ( <i>f</i> : 10 to 70)<br>Mental Component Summary (MCS-12) ( <i>f</i> : 6 to 72) | None                                                                                                                                                                                                                                                                                                                                                                                                                                                                   | The PCS-12 and MCS-12 are both functions of all 12 items and a constant. They are designed to replicate scores from the SF-36 PCS and MCS based on regression analysis.                              |

| Measure name | Construct according to developer(s) | Number of items, direction <sup>†</sup> and item-scaling                                | Summary scores (operation <sup>†</sup> : range <sup>§</sup> )                                                   | Sub-scales (operation <sup>†</sup> : range <sup>§</sup> )                                                                                                                                                                                                                                                                                                                                                                                                                                                                                                                                                                                                                                                                                                                                            | Notes                                                                                                                                                                                                                                                                                                                                                                          |
|--------------|-------------------------------------|-----------------------------------------------------------------------------------------|-----------------------------------------------------------------------------------------------------------------|------------------------------------------------------------------------------------------------------------------------------------------------------------------------------------------------------------------------------------------------------------------------------------------------------------------------------------------------------------------------------------------------------------------------------------------------------------------------------------------------------------------------------------------------------------------------------------------------------------------------------------------------------------------------------------------------------------------------------------------------------------------------------------------------------|--------------------------------------------------------------------------------------------------------------------------------------------------------------------------------------------------------------------------------------------------------------------------------------------------------------------------------------------------------------------------------|
| SF-36        | Health status / Health-related QOL  | 36 ↑<br>Between two and six response options. 2 items are scored with unequal intervals | Physical Component Summary (PCS) ( <i>f</i> : 2 to 76)<br>Mental Component Summary (MCS) ( <i>f</i> : -1 to 81) | Physical functioning ( <i>L</i> : 0 to 100)<br>limitations in physical activities because of health problems<br>Role—Physical ( <i>L</i> : 0 to 100)<br>limitations in usual role activities because of physical health problems<br>Bodily pain ( <i>L</i> : 0 to 100)<br>Severity and interference of bodily pain<br>General health( <i>L</i> : 0 to 100)<br>general health perceptions<br>Vitality ( <i>L</i> : 0 to 100)<br>energy and fatigue / subjective well-being<br>Social functioning ( <i>L</i> : 0 to 100)<br>limitations in social activities because of physical or emotional problems<br>Role—Emotional ( <i>L</i> : 0 to 100)<br>limitations in usual role activities because of emotional problems<br>Mental health ( <i>L</i> : 0 to 100)<br>psychological distress and well-being | The PCS and MCS are both functions of all eight sub-scales based on principal component analysis, and are transformed to yield means of 50 and standard deviations of 10 for a general national population.<br><br>The SF-36 includes an additional Health Transition item that does not contribute to the scales or summary scores and is not presented in the cited studies. |
| SWLS         | Global life satisfaction            | 5 ↑<br>Likert 1 to 7                                                                    | Score ( $\Sigma$ : 5 to 35)                                                                                     | None                                                                                                                                                                                                                                                                                                                                                                                                                                                                                                                                                                                                                                                                                                                                                                                                 | Five global life satisfaction items (life ideal, excellent conditions, satisfied with life, have what I want, would change nothing)                                                                                                                                                                                                                                            |

| Measure name | Construct according to developer(s) | Number of items, direction <sup>†</sup> and item-scaling | Summary scores (operation <sup>‡</sup> : range <sup>§</sup> )                                                                                                                                                                                                                                                                                                                                                                                                      | Sub-scales (operation <sup>‡</sup> : range <sup>§</sup> )                                                                                                                                                                                                                                                                                                                                                                                                                                                                                                                                                                                                       | Notes                                                                                                                                                                                                                                                                                                                                                              |
|--------------|-------------------------------------|----------------------------------------------------------|--------------------------------------------------------------------------------------------------------------------------------------------------------------------------------------------------------------------------------------------------------------------------------------------------------------------------------------------------------------------------------------------------------------------------------------------------------------------|-----------------------------------------------------------------------------------------------------------------------------------------------------------------------------------------------------------------------------------------------------------------------------------------------------------------------------------------------------------------------------------------------------------------------------------------------------------------------------------------------------------------------------------------------------------------------------------------------------------------------------------------------------------------|--------------------------------------------------------------------------------------------------------------------------------------------------------------------------------------------------------------------------------------------------------------------------------------------------------------------------------------------------------------------|
| WHOQOL-BREF  | QOL                                 | 26 ↑<br>Likert 1 to 5                                    | Physical ( <i>L</i> : 0 to 100)<br>personal evaluation of physical health<br>Psychological ( <i>L</i> : 0 to 100)<br>personal evaluation of psychological state<br>Social ( <i>L</i> : 0 to 100)<br>satisfaction with social relationships<br>Enviroment ( <i>L</i> : 0 to 100)<br>satisfaction with salient features of the environment (healthiness and safety of environment, living place, finances, information, leisure, transport and access to healthcare) | None                                                                                                                                                                                                                                                                                                                                                                                                                                                                                                                                                                                                                                                            | The four summary scores (domains) are calculated from 24 items, each of which represents one of the 24 facets of WHOQOL-100 (not described in this document). Two additional items, an overall assessment of QOL and an overall assessment of health are part of the WHOQOL-BREF but do not form part of the domains and are not reported in the included studies. |
| WHOQOL-OLD   | QOL of older adults                 | 24 ↑<br>Likert 1 to 5                                    | Total ( <i>x</i> : 1 to 5)                                                                                                                                                                                                                                                                                                                                                                                                                                         | Sensory abilities ( <i>x</i> : 1 to 5)<br>sensory functioning and the impact of loss of sensory abilities on QOL<br>Autonomy ( <i>x</i> : 1 to 5)<br>ability to live autonomously and to take own decisions<br>Past, present and future activities ( <i>x</i> : 1 to 5)<br>satisfaction about achievements in life and things to look forward to<br>Social Participation ( <i>x</i> : 1 to 5)<br>participation in activities of daily living, especially in the community<br>Death and Dying ( <i>x</i> : 1 to 5)<br>concerns, worries, and fears about death and dying<br>Intimacy ( <i>x</i> : 1 to 5)<br>ability to have personal and intimate relationships | The six sub-scales (facets) are additional to the 24 facets of the WHOQOL-100 (not described in this document).                                                                                                                                                                                                                                                    |

- † Direction after any reversing of item scores: ↑ Greater scores indicate better QOL; ↓ Lesser scores indicate better QOL.
- ‡ Operation performed on item scores to produce scale score.  $\Sigma$ : Sum of items;  $x$ : Mean of items;  $L$ : Mean of a linear transformation of the items;  $f$ : Other function (see notes); absent in the case of single item scales
- § Theoretical score range
- VAS Visual-analogue scale

## REFERENCES

- [1] Hyde M, Wiggins RD, Higgs P, Blane DB. A measure of quality of life in early old age: The theory, development and properties of a needs satisfaction model (CASP-19). *Aging & Mental Health*. 2003;7(3):186-94. doi: 10.1080/1360786031000101157.
- [2] Wiggins RD, Netuveli G, Hyde M, Higgs P, Blane D. The Evaluation of a Self-enumerated Scale of Quality of Life (CASP-19) in the Context of Research on Ageing: A Combination of Exploratory and Confirmatory Approaches. *Social Indicators Research*. 2007;89(1):61-77. doi: 10.1007/s11205-007-9220-5.
- [3] Steptoe A, Demakakos P, de Oliveira C, Wardle J. Distinctive biological correlates of positive psychological well-being in older men and women. *Psychosom Med*. 2012 Jun;74(5):501-8. doi: 10.1097/PSY.0b013e31824f82c8.
- [4] Gale CR, Cooper C, Deary IJ, Aihie Sayer A. Psychological well-being and incident frailty in men and women: the English Longitudinal Study of Ageing. *Psychological Medicine*. 2014;44(4):697-706. doi: 10.1017/S0033291713001384.
- [5] Brooks R. EuroQol: the current state of play. *Health Policy*. 1996;37(1):53-72. doi: 10.1016/0168-8510(96)00822-6.
- [6] The EuroQol Group. EuroQol - a new facility for the measurement of health-related quality of life. *Health Policy*. 1990;16(3):199-208. doi: 10.1016/0168-8510(90)90421-9.
- [7] Rabin R, Charro Fd. EQ-5D: a measure of health status from the EuroQol Group. *Annals of Medicine*. 2009;33(5):337-43. doi: 10.3109/07853890109002087.
- [8] da Rocha NS, Power MJ, Bushnell DM, Fleck MP. The EUROHIS-QOL 8-item index: Comparative psychometric properties to its parent WHOQOL-BREF. *Value in Health*. 2012;15(3):449-57. doi: 10.1016/j.jval.2011.11.035.
- [9] Power M. Development of a common instrument for quality of life In: Nosikov A, Gudex C, editors. *EUROHIS: Developing Common Instruments for Health Surveys*. Amsterdam: IOS Press; 2003. p. 145-59.
- [10] Schmidt S, Mühlan H, Power M. The EUROHIS-QOL 8-item index: Psychometric results of a cross-cultural field study. *European Journal of Public Health*. 2006;16(4):420-8. doi: 10.1093/eurpub/cki155.
- [11] Pinto JM, Fontaine AM, Neri AL. The influence of physical and mental health on life satisfaction is mediated by self-rated health: A study with Brazilian elderly. *Archives of Gerontology and Geriatrics*. 2016;65:104-10. doi: 10.1016/j.archger.2016.03.009.
- [12] Yang F, Gu D, Mitnitski A. Frailty and life satisfaction in Shanghai older adults: The roles of age and social vulnerability. *Archives of Gerontology & Geriatrics*. 2016;67:68-73. doi: 10.1016/j.archger.2016.07.001.
- [13] St John PD, Tyas SL, Montgomery PR. Life satisfaction and frailty in community-based older adults: Cross-sectional and prospective analyses. *International Psychogeriatrics*. 2013 Oct;25(10):1709-16. doi: 10.1017/S1041610213000902.
- [14] Andrews FM, Crandall R. The validity of self-reported well-being. *Social Indicators Research*. 1976;3(1):1-19. doi: 10.1007/BF00286161.
- [15] Michalos AC. Satisfaction and happiness. *Social Indicators Research*. 1980;8(4):385-422. doi: 10.1007/BF00461152.
- [16] Bowling A. The Psychometric Properties of the Older People's Quality of Life Questionnaire, Compared with the CASP-19 and the WHOQOL-OLD. *Current Gerontology and Geriatrics Research*. 2009;2009:Article 298950. doi: 10.1155/2009/298950.
- [17] Bowling A, Stenner P. Which measure of quality of life performs best in older age? A comparison of the OPQOL, CASP-19 and WHOQOL-OLD. *Journal of Epidemiology and Community Health*. 2011;65(3):273-80. doi: 10.1136/jech.2009.087668.
- [18] Ament BHL, de Vugt ME, Verhey FRJ, Kempen GJM. Are physically frail older persons more at risk of adverse outcomes if they also suffer from cognitive, social, and psychological frailty? *European Journal of Ageing*. 2014 Sep;11(3):213-9. doi: 10.1007/s10433-014-0308-x.

- [19] Clarke PJ, Marshall VW, Ryff CD, Wheaton B. Measuring Psychological Well-Being in the Canadian Study of Health and Aging. *International Psychogeriatrics*. 2001;13(S1):79-90. doi: 10.1017/s1041610202008013.
- [20] Ware JE, Kosinski MA, Keller SD. *SF-12: How to Score the SF-12 Physical and Mental Health Summary Scales*. 2nd ed. Boston, MA: The Health Institute, New England Medical Center; 1995.
- [21] Ware JE, Kosinski M, Keller SD. A 12-Item Short-Form Health Survey: construction of scales and preliminary tests of reliability and validity. *Medical care*. 1996;34(3):220-33.
- [22] Ware JE. *SF-36 Health Survey: Manual and Interpretation Guide*. 1993.
- [23] Ware JE, Sherbourne CD. The MOS 36-item short-form health survey (SF-36): I. Conceptual framework and item selection. *Medical Care*. 1992 Jun;30(6):473-83.
- [24] McHorney CA, Ware JE, Raczek AE. The MOS 36-Item Short-Form Health Survey (SF-36): II. Psychometric and clinical tests of validity in measuring physical and mental health constructs. *Medical Care*. 1993;31(3):247-63.
- [25] Ware JE, Kosinski M, Bayliss MS, McHorney CA, Rogers WH, Raczek AE. Comparison of methods for the scoring and statistical analysis of SF-36 health profile and summary measures: Summary of results from the Medical Outcomes Study. *Medical Care*. 1995;33(4 Suppl.):AS264-AS79.
- [26] Diener E, Emmons RA, Larsen RJ, Griffin S. The Satisfaction With Life Scale. *Journal of Personality Assessment*. 1985 Feb;49(1):71-5. doi: 10.1207/s15327752jpa4901\_13.
- [27] Pavot W, Diener E, Colvin CR, Sandvik E. Further Validation of the Satisfaction With Life Scale: Evidence for the Cross-Method Convergence of Well-Being Measures. *Journal of Personality Assessment*. 1991 Aug;57(1):149-61. doi: 10.1207/s15327752jpa5701\_17.
- [28] The WHOQOL Group. Development of the World Health Organization WHOQOL-BREF Quality of Life Assessment. *Psychological Medicine*. 1998;28(3):551-8. doi: 10.1017/S0033291798006667.
- [29] Skevington SM, Lotfy M, O'Connell KA. The World Health Organization's WHOQOL-BREF quality of life assessment: psychometric properties and results of the international field trial. A report from the WHOQOL group. *Quality of Life Research*. 2004;13(2):299-310. doi: 10.1023/B:QURE.0000018486.91360.00.
- [30] Power M, Quinn K, Schmidt S, WHOQOL-OLD Group. Development of the WHOQOL-OLD module. *Quality of Life Research*. 2005;14(10):2197-214. Power M Quinn K Schmidt S WHOQOL-OLD Group.
