# Supplementary material for: Quality of life is substantially worse for community-dwelling older people living with frailty: systematic review and meta-analysis
Source: Qual Life Res. 2019 Mar 14;28(8):2041–56. doi: 10.1007/s11136-019-02149-1 (PMC6620381; doi:10.1007/s11136-019-02149-1)
Supplement: Supplementary file 7 — Supplementary material 7 (PDF 208 KB) [file 11136_2019_2149_MOESM7_ESM.pdf]

## Analyses of associations between QOL and frailty from individual studies

| Study details                                                                                                                | Numbers of participants and QOL scores by frailty category <sup>a</sup> |                        |                                                                                        | Reported analyses of associations between frailty and QOL                                                                                                                                                                                                                                                                                                                                                                                                                                                                                                                                                                                                                                                                                                                                                                                                                                                                                                                                                         | Covariates adjusted for                                                                                                                                                                                                              |
|------------------------------------------------------------------------------------------------------------------------------|-------------------------------------------------------------------------|------------------------|----------------------------------------------------------------------------------------|-------------------------------------------------------------------------------------------------------------------------------------------------------------------------------------------------------------------------------------------------------------------------------------------------------------------------------------------------------------------------------------------------------------------------------------------------------------------------------------------------------------------------------------------------------------------------------------------------------------------------------------------------------------------------------------------------------------------------------------------------------------------------------------------------------------------------------------------------------------------------------------------------------------------------------------------------------------------------------------------------------------------|--------------------------------------------------------------------------------------------------------------------------------------------------------------------------------------------------------------------------------------|
|                                                                                                                              | Fit <sup>†</sup>                                                        | Pre-frail <sup>‡</sup> | Frail <sup>§</sup>                                                                     |                                                                                                                                                                                                                                                                                                                                                                                                                                                                                                                                                                                                                                                                                                                                                                                                                                                                                                                                                                                                                   |                                                                                                                                                                                                                                      |
| Ament 2014<br><br>N=334<br>Frailty:<br>Groningen Frailty indicator<br>QoL: Single item general QOL assessment (unreferenced) | n=0 <sup>b</sup>                                                        | n=0 <sup>b</sup>       | n=334 (100%)<br><br>QoL excellent, very good or good: 50%,<br>QoL moderate or bad: 50% | Analyses only conducted for domains of frailty                                                                                                                                                                                                                                                                                                                                                                                                                                                                                                                                                                                                                                                                                                                                                                                                                                                                                                                                                                    | Age, sex, baseline quality of life, multimorbidity                                                                                                                                                                                   |
| CSHA<br><br>N=5,703<br>Frailty:<br>Cumulative Deficit Model<br>QoL: Ryff Psychological Well-Being scale                      | n=4677 (82%)<br><br>QoL scores not reported by frailty category         | n=0 <sup>c</sup>       | n=1026 (18%)                                                                           | Baseline Pearson's r = 0.23, P < 0.001<br><br>Linear regression (QOL dependent)<br>Coefficient for frailty (95% CI) p-value:<br>Ryff psychological well-being index<br>Total 0.29 (0.22 to 0.36) ***<br>- Autonomy 0.012 (-0.0069 to 0.031) -<br>- Mastery 0.12 (0.099 to 0.13) ***<br>- Acceptance 0.071 (0.049 to 0.092) ***<br>- Purpose -0.002 (-0.028 to 0.023) -<br>- Relations 0.047 (0.024 to 0.069) ***<br>- Growth 0.057 (0.033 to 0.081) ***<br><br>AUC = 0.59 [95% confidence interval (CI) 0.54 to 0.64], ***<br><br>logistic regression model, (five-year frailty dependent)<br>Baseline Ryff psychological well-being scale did not significantly predict frailty [p = 0.216] (n=557)<br><br>Mediation model while covarying for other pertinent factors, PWB -> Frailty, and via Depression (n = 557):<br>Coefficient (95% CI), p<br>Total -0.186 (-0.347 to -0.025) *<br>Direct -0.108 (-0.278 to 0.062) -<br>Indirect -0.074 (-0.135 to -0.023) **<br>indicating a full mediation relationship. | Regression analysis adjusted for age, gender, education, mental health, and 3MS score.<br><br>Logistic regression and mediation models adjusted for age, gender and baseline frailty.<br>Mediation via depression in mediation model |

| Study details      |                    | Numbers of participants and QOL scores by frailty category <sup>a</sup> |                        |                    | Reported analyses of associations between frailty and QOL                                                                                                                            | Covariates adjusted for                                                                                                           |
|--------------------|--------------------|-------------------------------------------------------------------------|------------------------|--------------------|--------------------------------------------------------------------------------------------------------------------------------------------------------------------------------------|-----------------------------------------------------------------------------------------------------------------------------------|
|                    |                    | Fit <sup>†</sup>                                                        | Pre-frail <sup>‡</sup> | Frail <sup>§</sup> |                                                                                                                                                                                      |                                                                                                                                   |
| Bilotta 2010       | n=72 (30%)         |                                                                         | n=89 (37%)             | n=78 (33%)         |                                                                                                                                                                                      |                                                                                                                                   |
| N=239              | OPQOL, mean (SD)   |                                                                         |                        |                    | Between group differences:                                                                                                                                                           |                                                                                                                                   |
| Frailty: Study of  | total              | 125.9 (13.2)                                                            | 115.6 (13.9)           | 107.4 (12.6)       | *                                                                                                                                                                                    |                                                                                                                                   |
| Osteoporotic       | - life overall     | 14.9 (2.4)                                                              | 13.0 (2.8)             | 12.0 (3.2)         | *                                                                                                                                                                                    |                                                                                                                                   |
| Fractures criteria | - health           | 12.9 (2.6)                                                              | 10.5 (2.8)             | 8.2 (2.8)          | *                                                                                                                                                                                    |                                                                                                                                   |
|                    | - social           | 17.8 (3.2)                                                              | 17.2 (3.3)             | 17.2 (3.5)         | -                                                                                                                                                                                    |                                                                                                                                   |
| QoL: Older         | - independence     | 14.2 (2.9)                                                              | 12.4 (3.0)             | 10.7 (2.8)         | *                                                                                                                                                                                    |                                                                                                                                   |
| People's Quality   | - home             | 16.7 (2.2)                                                              | 15.9 (2.4)             | 15.3 (1.8)         | *                                                                                                                                                                                    |                                                                                                                                   |
| of Life            | - psychological    | 15.1 (2.5)                                                              | 13.7 (2.9)             | 12.6 (2.6)         | *                                                                                                                                                                                    |                                                                                                                                   |
| questionnaire      | - finances         | 13.5 (3.2)                                                              | 13.1 (3.0)             | 12.8 (3.3)         | -                                                                                                                                                                                    |                                                                                                                                   |
|                    | - activities       | 20.8 (3.5)                                                              | 19.7 (3.1)             | 18.7 (2.5)         | *                                                                                                                                                                                    |                                                                                                                                   |
|                    |                    |                                                                         |                        |                    | Linear regression analysis,<br>OPQOL total as dependent variable,<br>Being frail unstandardized coefficient (95% CI):<br>-6.36 (-10.37 to -2.35) *                                   | age, basic ADLs instrumental<br>ADLs, MMSE, depression, CIRS<br>m, fell in past year, number of<br>drugs                          |
| Chang 2012         | n=117 (31%)        |                                                                         | n=235 (63%)            | n=22 (6%)          |                                                                                                                                                                                      |                                                                                                                                   |
| N=374              | SF-36, mean(SD)    |                                                                         |                        |                    | ANOVA:                                                                                                                                                                               |                                                                                                                                   |
| Frailty: Fried     | Physical function  | 83.3 (18.7)                                                             | 77.6 (20.2)            | 54.8 (26.16)       | ***                                                                                                                                                                                  |                                                                                                                                   |
| QoL: SF-36         | Role physical      | 75.9 (40.7)                                                             | 77.1 (39.0)            | 45.5 (48.6)        | **                                                                                                                                                                                   |                                                                                                                                   |
|                    | Bodily pain        | 80.3 (20.5)                                                             | 77.1 (21.6)            | 59.2 (17.4)        | ***                                                                                                                                                                                  |                                                                                                                                   |
|                    | General health     | 60.3 (11.5)                                                             | 60.1 (15.2)            | 48.7 (18.9)        | **                                                                                                                                                                                   |                                                                                                                                   |
|                    | Vitality           | 77.9 (16.4)                                                             | 67.8 (17.7)            | 55.9 (19.4)        | ***                                                                                                                                                                                  |                                                                                                                                   |
|                    | Social functioning | 91.7 (13.4)                                                             | 87.7 (14.3)            | 67.6 (21.7)        | ***                                                                                                                                                                                  |                                                                                                                                   |
|                    | Role emotional     | 92.6 (24.8)                                                             | 87.4 (30.3)            | 71.2 (44.0)        | **                                                                                                                                                                                   |                                                                                                                                   |
|                    | Mental health      | 84.2 (14.2)                                                             | 76.8 (13.9)            | 67.5 (17.3)        | ***                                                                                                                                                                                  |                                                                                                                                   |
|                    | PCS                | 48.6 (8.2)                                                              | 48.4 (8.4)             | 39.5 (7.8)         | ***                                                                                                                                                                                  |                                                                                                                                   |
|                    | MCS                | 56.8 (7.7)                                                              | 52.0 (8.8)             | 43.3 (12.3)        | ***                                                                                                                                                                                  |                                                                                                                                   |
|                    |                    |                                                                         |                        |                    | Multivariate linear regression:-<br>PCS as dependent variable, $\beta$ (95% CI):<br>Prefrail 1.461 (-0.499 to 3.421)<br>Frail -6.289** (-10.398 to -2.181)<br>R <sup>2</sup> = 0.131 | age, number of co-morbidities,<br>living alone, falls in the previous<br>year, arthritis, peptic ulcer<br>disease, and depression |
|                    |                    |                                                                         |                        |                    | MCS as dependent variable, $\beta$ (95% CI):<br>Prefrail -3.772*** (-5.731 to -1.813)<br>Frail -9.436*** (-13.543 to -5.329)<br>R <sup>2</sup> = 0.248                               |                                                                                                                                   |

| Study details                     |                                             | Numbers of participants and QoL scores by frailty category <sup>a</sup> |                        |                    | Reported analyses of associations between frailty and QoL                                                                                                                  | Covariates adjusted for                                                                                                                                                                                                                                                                                                                  |
|-----------------------------------|---------------------------------------------|-------------------------------------------------------------------------|------------------------|--------------------|----------------------------------------------------------------------------------------------------------------------------------------------------------------------------|------------------------------------------------------------------------------------------------------------------------------------------------------------------------------------------------------------------------------------------------------------------------------------------------------------------------------------------|
|                                   |                                             | Fit <sup>†</sup>                                                        | Pre-frail <sup>‡</sup> | Frail <sup>§</sup> |                                                                                                                                                                            |                                                                                                                                                                                                                                                                                                                                          |
| Chang 2016                        | n=72 (30%)                                  |                                                                         | n=89 (37%)             | n=78 (33%)         | Between group differences (Chi-squared test):<br>p-value; Scheffe<br>***, †>§, ‡>§<br>***, †>§; ‡>§<br>***, †>§; ‡>§<br>***, †>§; ‡>§                                      | Regression adjusted for sex, age, education, employment, has income, lives alone, number of chronic diseases, fell last year, fracture last year, smoked ever, consumed alcohol last month, self-perceived health, self-perceived happiness, BMI, waist circumference, SBP, DBP, BMD, grip strength                                      |
| N=239                             | WHOQOL-BREF, mean (SD):                     |                                                                         |                        |                    | Multiple linear regressions; QoL subscales dependent. Independent binary frailty variable B coefficients (95% CIs):-                                                       |                                                                                                                                                                                                                                                                                                                                          |
| Frailty: Study of                 | Physical                                    | 3.65 (0.49)                                                             | 3.26 (0.50)            | 2.74 (0.54)        | Physical -0.01 (-0.15 to 0.12)                                                                                                                                             |                                                                                                                                                                                                                                                                                                                                          |
| Osteoporotic                      | Psychological                               | 3.66 (0.42)                                                             | 3.61 (0.39)            | 2.95 (0.52)        | Psychological -0.13 (-0.28 to 0.01)                                                                                                                                        |                                                                                                                                                                                                                                                                                                                                          |
| Fractures criteria                | Social                                      | 3.58 (0.44)                                                             | 3.53 (0.39)            | 3.23 (0.42)        | Social -0.12 (-0.28 to 0.03)                                                                                                                                               |                                                                                                                                                                                                                                                                                                                                          |
|                                   | Environment                                 | 3.64 (0.35)                                                             | 3.61 (0.29)            | 3.32 (0.38)        | Environment -0.16 (-0.30 to -0.02)*                                                                                                                                        |                                                                                                                                                                                                                                                                                                                                          |
| QoL: WHOQOL-BREF                  |                                             |                                                                         |                        |                    |                                                                                                                                                                            |                                                                                                                                                                                                                                                                                                                                          |
| Coelho 2015                       | n=39 (15%)                                  |                                                                         | n=121 (48%)            | n=92 (37%)         | Correlation coefficient (r), coefficient of determination (R <sup>2</sup> ), p-value:<br>WHOQOL-OLD and TFI, -0.65, 42.1%, ***<br>EUROHIS-QOL-8 and TFI, -0.62, 38.7%, *** |                                                                                                                                                                                                                                                                                                                                          |
| N=252                             | QoL scores not reported by frailty category |                                                                         |                        |                    |                                                                                                                                                                            |                                                                                                                                                                                                                                                                                                                                          |
| Frailty: Tilburg                  |                                             |                                                                         |                        |                    |                                                                                                                                                                            |                                                                                                                                                                                                                                                                                                                                          |
| QoL: WHOQOL-OLD and EUROHIS-QOL-8 |                                             |                                                                         |                        |                    |                                                                                                                                                                            |                                                                                                                                                                                                                                                                                                                                          |
| ELSA (Gale 2014)                  | n=1186 (46%)                                |                                                                         | n=1058 (41%)           | n=313 (12%)        | Differences between groups (ANOVA, Chi-squared test): p-value<br>† and ‡; ‡ and §<br>*** ***<br>*** ***<br>*** ***                                                         | All regression models are adjusted for:<br>(a) age, sex and baseline value of the dependent variable (i.e. frailty status or psychological well-being).<br><br>(b) Fully adjusted models additionally include: household wealth, smoking status, number of chronic physical diseases, BMI, depressive symptom score, cognitive function. |
| N=2,557                           | CASP-19, mean (SD):                         |                                                                         |                        |                    | Multinomial logistic regressions:-<br>RR (95% CI), for incident (pre-)frailty (model a):-<br><i>Pre-frailty</i>                                                            |                                                                                                                                                                                                                                                                                                                                          |
| Frailty:                          | Total                                       | 46.0 (7.63)                                                             | 42.8 (7.96)            | 38.0 (7.65)        | CASP-19 Total 0.69 (0.63 to 0.77)                                                                                                                                          |                                                                                                                                                                                                                                                                                                                                          |
| Cumulative                        | Hedonic <sup>d</sup>                        | 10.6 (1.67)                                                             | 10.1 (1.66)            | 9.34 (1.80)        | - Hedonic <sup>d</sup> 0.75 (0.68 to 0.83)                                                                                                                                 |                                                                                                                                                                                                                                                                                                                                          |
| Deficit Model                     | Eudaimonic <sup>e</sup>                     | 35.3 (6.47)                                                             | 32.7 (6.79)            | 28.6 (6.22)        | - Eudaimonic <sup>e</sup> 0.70 (0.63 to 0.78)                                                                                                                              |                                                                                                                                                                                                                                                                                                                                          |
| QoL: CASP-19                      |                                             |                                                                         |                        |                    | RR (95% CI), for incident (pre-)frailty (model b, fully adjusted):-<br><i>Pre-frailty</i>                                                                                  |                                                                                                                                                                                                                                                                                                                                          |
|                                   |                                             |                                                                         |                        |                    | Total score 0.79 (0.71 to 0.89)                                                                                                                                            |                                                                                                                                                                                                                                                                                                                                          |
|                                   |                                             |                                                                         |                        |                    | - Hedonic <sup>d</sup> 0.83 (0.74 to 0.92)                                                                                                                                 |                                                                                                                                                                                                                                                                                                                                          |
|                                   |                                             |                                                                         |                        |                    | - Eudaimonic <sup>e</sup> 0.76 (0.72 to 0.90)                                                                                                                              |                                                                                                                                                                                                                                                                                                                                          |
|                                   |                                             |                                                                         |                        |                    | Four-year PWB total score (95% CI):<br><i>Incidence of model a</i>                                                                                                         |                                                                                                                                                                                                                                                                                                                                          |
|                                   |                                             |                                                                         |                        |                    | pre-frailty -1.58 (-0.93 to -2.22)                                                                                                                                         |                                                                                                                                                                                                                                                                                                                                          |
|                                   |                                             |                                                                         |                        |                    | frailty -3.70 (-1.99 to -5.41)                                                                                                                                             |                                                                                                                                                                                                                                                                                                                                          |
|                                   |                                             |                                                                         |                        |                    | Also significant relative declines in hedonic and eudaimonic scores for incidence of pre-frailty and frailty (data not shown).                                             |                                                                                                                                                                                                                                                                                                                                          |

| Study details                                                                                                     | Numbers of participants and QoL scores by frailty category <sup>a</sup>                                                                             |                                                    |                                                                                 | Reported analyses of associations between frailty and QoL                                                                                                                                                                                                                                                                                                                                                                                                                                                                                                                  | Covariates adjusted for                                                                                                                                                                                                                                     |
|-------------------------------------------------------------------------------------------------------------------|-----------------------------------------------------------------------------------------------------------------------------------------------------|----------------------------------------------------|---------------------------------------------------------------------------------|----------------------------------------------------------------------------------------------------------------------------------------------------------------------------------------------------------------------------------------------------------------------------------------------------------------------------------------------------------------------------------------------------------------------------------------------------------------------------------------------------------------------------------------------------------------------------|-------------------------------------------------------------------------------------------------------------------------------------------------------------------------------------------------------------------------------------------------------------|
|                                                                                                                   | Fit <sup>†</sup>                                                                                                                                    | Pre-frail <sup>‡</sup>                             | Frail <sup>§</sup>                                                              |                                                                                                                                                                                                                                                                                                                                                                                                                                                                                                                                                                            |                                                                                                                                                                                                                                                             |
| ELSA (Hubbard 2014)<br><br>N=3,206<br>Frailty: Cumulative Deficit Model<br>QoL: CASP-19                           | Very fit: n=1879 (59%); Well: n =343 (11%)<br><br>CASP-19 total, mean (95% CI)<br>Very fit: 46.4 (46.0 to 46.7); Well: 42.3 (41.6 to 43.1)          | Vulnerable: n=556 (17%)<br><br>39.8 (39.1 to 40.4) | Frail: n=428 (13%)<br><br>33.6 (32.7 to 34.5)                                   | Pearson correlation coefficient (r):<br>CASP-19: -0.58<br><br>Linear regressions, CASP-19 dependent:<br>Model 1:<br>Frailty B coefficient = -35.3 (-38.0 to -32.5);<br>R <sup>2</sup> = 0.362<br><br>Model 2:<br>Frailty B=-34.4 (-37.1 to -31.6);<br>R <sup>2</sup> = 0.376                                                                                                                                                                                                                                                                                               | Both models: age, sex, smoking, and level of physical activity.<br>Model 2 also: net financial wealth and net income.<br>Models weighted to compensate for survey non-response and to take into account the survey's complex clustering and stratification. |
| Freitag 2016<br><br>N=210<br>Frailty: Tilburg<br>QoL: SF-12 and EUROHIS-8                                         | n=123<br><br>QoL scores not reported by frailty category                                                                                            | n=0 <sup>c</sup>                                   | n=87                                                                            | Correlation coefficients:<br>EUROHIS-8: -0.562 ***<br>SF-12 PCS: -0.589 ***<br>SF-12 MCS: -0.450 ***                                                                                                                                                                                                                                                                                                                                                                                                                                                                       | None                                                                                                                                                                                                                                                        |
| Gobbens 2012<br><br>N=479 (in 2008)<br>N=336 (in 2009)<br>N=266 (in 2010)<br>Frailty: Tilburg<br>QoL: WHOQOL-BREF | Number of participants not reported by frailty category<br><br>QoL scores not reported by frailty category                                          |                                                    |                                                                                 | Correlation coefficients with TFI in 2008 (baseline):<br>2008 (baseline) 2010 (+2 years)<br>Physical -.72*** -.68***<br>Psychological -.68*** -.59***<br>Social relationships -.39*** -.37***<br>Environmental -.54*** -.45***<br><br>Sequential regression analyses, 2010 QoL subscales dependent, 2008 independent variables:<br>R <sup>2</sup> increase for addition of frailty domains to model; R <sup>2</sup> for overall model:<br>Physical .037***; .64***<br>Psychological .044***; .56***<br>Social relationships .046***; .42***<br>Environmental .018*; .56*** | baseline of the QoL variable, gender, age, marital status, education, income, lifestyle, life events, chronic diseases                                                                                                                                      |
| Gobbens 2013<br><br>N=1,031<br>Frailty: Tilburg<br>QoL: WHOQOL-BREF                                               | n=745 (72%)<br><br>WHOQOL-BREF, mean(SD):<br>Physical 16.68 (1.82)<br>Psychological 15.06 (1.73)<br>Social 15.08 (2.29)<br>Environment 16.23 (1.78) | n=0 <sup>c</sup>                                   | n=286 (28%)<br><br>13.61 (2.35)<br>13.32 (1.86)<br>13.11 (2.57)<br>14.58 (2.04) |                                                                                                                                                                                                                                                                                                                                                                                                                                                                                                                                                                            |                                                                                                                                                                                                                                                             |

| Study details   |                                                      | Numbers of participants and QOL scores by frailty category <sup>a</sup> |                        |                           | Reported analyses of associations between frailty and QOL                                  | Covariates adjusted for         |
|-----------------|------------------------------------------------------|-------------------------------------------------------------------------|------------------------|---------------------------|--------------------------------------------------------------------------------------------|---------------------------------|
|                 |                                                      | Fit <sup>†</sup>                                                        | Pre-frail <sup>‡</sup> | Frail <sup>§</sup>        |                                                                                            |                                 |
| Jurschik 2012   | n=227 (43%)                                          |                                                                         | n=246 (47%)            | n=50 (10%)                |                                                                                            |                                 |
| N=640           | SF-36 [including pre-frail - n=473 (90%)], mean (SD) |                                                                         |                        |                           | Between group differences (Student's t-test), p-value:                                     | In logistic regression: age,    |
| Frailty: Fried  | Physical function                                    | 68.40 (26.3)                                                            |                        | 24.29 (24.4)              | ***                                                                                        | gender, marital status, alcohol |
| QoL: SF-36      | Role physical                                        | 82.75 (32.5)                                                            |                        | 42.35 (46.3)              | *** §                                                                                      | use, comorbidity, cognitive     |
|                 | Bodily pain                                          | 40.94 (15.8)                                                            |                        | 42.04 (19.7)              | -                                                                                          | status, basic disability,       |
|                 | General health                                       | 68.40 (26.3)                                                            |                        | 24.29 (24.4)              | ***                                                                                        | instrumental disability,        |
|                 | Vitality                                             | 58.03 (17.6)                                                            |                        | 40.82 (18.5)              | ***                                                                                        | depressive symptoms, vision     |
|                 | Social functioning                                   | 87.45 (21.3)                                                            |                        | 59.64 (23.9) <sup>f</sup> | ***                                                                                        | problems, malnutrition, self-   |
|                 | Role emotional                                       | 87.72 (29.8)                                                            |                        | 54.42 (48.4)              | ***                                                                                        | perceived health, polypharmacy, |
|                 | Mental health                                        | 73.86 (22.2)                                                            |                        | 54.64 (29.7)              | ***                                                                                        | falls in the last year, social  |
|                 |                                                      |                                                                         |                        |                           | Logistic regression: p>.05 for each SF-36 domain <sup>h</sup>                              | relations and SF-36 scales      |
| Kanauchi 2008   | n=77 (76%)                                           |                                                                         | n=0 <sup>c</sup>       | n=24 (24%)                |                                                                                            | except bodily pain              |
| N=101           | WHOQOL-BREF, mean ± SE:                              |                                                                         |                        |                           | Between group differences (ANCOVA), p-value:                                               | Adjusting for factors such as   |
| Frailty: Hebrew | Physical                                             | 3.65 ± 0.06                                                             |                        | 3.07 ± 0.12               | ***                                                                                        | age, creatinine clearance and   |
| Rehabilitation  | Psychological                                        | 3.61 ± 0.06                                                             |                        | 3.11 ± 0.12               | ***                                                                                        | depressed mood                  |
| Center for Aged | Social                                               | 3.30 ± 0.07                                                             |                        | 3.14 ± 0.14               | -                                                                                          |                                 |
| Vulnerability   | Enviroment                                           | 3.59 ± 0.04                                                             |                        | 3.08 ± 0.12               | ***                                                                                        |                                 |
| Index           |                                                      |                                                                         |                        |                           |                                                                                            |                                 |
| QoL: WHOQOL-    |                                                      |                                                                         |                        |                           |                                                                                            |                                 |
| BREF            |                                                      |                                                                         |                        |                           |                                                                                            |                                 |
| Lahousse 2014   | n=1,216 (43%)                                        |                                                                         | n=1,454 (51%)          | n=163 (6%)                | logistic regression, QOL as dependent variable                                             | age and sex                     |
| N=2,833         | EQ-VAS, median [IQR]                                 |                                                                         |                        |                           | frail vs. non-frail and intermediate frail group combined:                                 |                                 |
| Frailty: Fried  |                                                      |                                                                         |                        |                           | ***                                                                                        |                                 |
| QoL: EuroQol    | 80 [15]                                              | 80 [15]                                                                 | 70 [20]                |                           |                                                                                            |                                 |
| Visual analogue |                                                      |                                                                         |                        |                           |                                                                                            |                                 |
| scale (EQ-VAS)  |                                                      |                                                                         |                        |                           |                                                                                            |                                 |
| Lenardt 2014    | n=49 (24%)                                           |                                                                         | n=115 (57%)            | n=39 (19%)                | Between group differences (Kruskall-Wallis H),<br>p-value; post-hoc by-group significance: | none                            |
| N=203           | SF-36, mean (SD)                                     |                                                                         |                        |                           |                                                                                            |                                 |
| Frailty: Fried  | Physical function                                    | 87.7 (16.9)                                                             | 73.2 (24.5)            | 61.1 (27.9)               | ***, †>‡>§                                                                                 |                                 |
| QoL: SF-36      | Role physical                                        | 96.4 (16.1)                                                             | 80.4 (36.2)            | 71.1 (41.1)               | ***, †>(‡,§)                                                                               |                                 |
|                 | Bodily pain                                          | 78.9 (24.6)                                                             | 62.5 (31.8)            | 60.4 (30.7)               | ***, †>(‡,§)                                                                               |                                 |
|                 | General health                                       | 76.0 (22.5)                                                             | 73.0 (22.7)            | 71.4 (17.0)               | -                                                                                          |                                 |
|                 | Vitality                                             | 85.8 (17.2)                                                             | 75.9 (22.4)            | 75.0 (24.4)               | *, †>(‡,§)                                                                                 |                                 |
|                 | Social functioning                                   | 89.9 (24.6)                                                             | 88.6 (25.3)            | 85.6 (25.6)               | -                                                                                          |                                 |
|                 | Role emotional                                       | 89.5 (30.8)                                                             | 87.9 (31.1)            | 81.1 (36.5)               | -                                                                                          |                                 |
|                 | Mental health                                        | 85.3 (16.7)                                                             | 77.9 (23.2)            | 76.4 (23.4)               | -                                                                                          |                                 |

| Study details  |                                 | Numbers of participants and QOL scores by frailty category <sup>a</sup> |                        |                    | Reported analyses of associations between frailty and QOL                 | Covariates adjusted for             |
|----------------|---------------------------------|-------------------------------------------------------------------------|------------------------|--------------------|---------------------------------------------------------------------------|-------------------------------------|
|                |                                 | Fit <sup>†</sup>                                                        | Pre-frail <sup>‡</sup> | Frail <sup>§</sup> |                                                                           |                                     |
| Lin 2011       | n=426 (46%)                     |                                                                         | n=415 (44%)            | n=92 (10%)         |                                                                           |                                     |
| N=903          | SF-36, adjusted mean ± SE       |                                                                         |                        |                    | Between frailty categories difference (ANCOVA):                           | Age (years), Gender, education,     |
| Frailty: Fried | Physical function 85.60 ± 1.32  |                                                                         | 80.62 ± 1.25           | 62.74 ± 1.96       | F value; Multiple post-hoc comparison                                     | money use, You see                  |
| QoL: SF-36     | Role physical 93.95 ± 2.67      |                                                                         | 83.26 ± 2.52           | 78.16 ± 3.96       | 56.46***; †>‡>§                                                           | relatives/friends when you          |
|                | Bodily pain 83.49 ± 1.34        |                                                                         | 81.23 ± 1.26           | 74.29 ± 1.99       | 12.13***; †>(‡,§)                                                         | want, Visual capacity, hearing      |
|                | General health 66.96 ± 1.57     |                                                                         | 60.55 ± 1.48           | 49.22 ± 2.33       | 8.89***; †>‡>§                                                            | capacity, regular exercise,         |
|                | Vitality 77.69 ± 1.51           |                                                                         | 72.13 ± 1.42           | 63.15 ± 2.24       | 25.95***; †>‡>§                                                           | hypertension, heart disease,        |
|                | Social functioning 95.94 ± 1.21 |                                                                         | 91.57 ± 1.14           | 80.17 ± 1.79       | 19.45***; †>‡>§                                                           | Hyperuricemia, Arthritis,           |
|                | Role emotional 94.38 ± 2.21     |                                                                         | 87.28 ± 2.08           | 85.90 ± 3.28       | 32.45***; †>‡>§                                                           | Cataract, fall history, pain, sleep |
|                | Mental health 82.31 ± 1.33      |                                                                         | 79.69 ± 1.25           | 73.67 ± 1.97       | 7.01***; †>(‡,§)                                                          | disorder                            |
|                | PCS 50.48 ± 0.53                |                                                                         | 48.01 ± 0.50           | 42.56 ± 0.79       | 8.17***; †>‡>§                                                            |                                     |
|                | MCS 56.22 ± 0.62                |                                                                         | 54.47 ± 0.59           | 52.64 ± 0.92       | 43.61***; †>‡>§                                                           |                                     |
|                |                                 |                                                                         |                        |                    | 8.10***; †>(‡,§)                                                          |                                     |
|                |                                 |                                                                         |                        |                    | Multivariate logistic regression. Odds ratio of “successful aging” (SF-36 |                                     |
|                |                                 |                                                                         |                        |                    | MCS AND PCS score in the highest tertile: PCS>=53.00; MCS>=59.28)         |                                     |
|                |                                 |                                                                         |                        |                    | Pre-frail vs. Fit 0.45 (0.24 to 0.84)                                     |                                     |
|                |                                 |                                                                         |                        |                    | Frail vs. Fit 0.14 (0.02 to 1.13)                                         |                                     |

| Study details                                    |                                                         | Numbers of participants and QOL scores by frailty category <sup>a</sup> |                        |                    | Reported analyses of associations between frailty and QOL                                                                                         | Covariates adjusted for                                                                                                              |
|--------------------------------------------------|---------------------------------------------------------|-------------------------------------------------------------------------|------------------------|--------------------|---------------------------------------------------------------------------------------------------------------------------------------------------|--------------------------------------------------------------------------------------------------------------------------------------|
|                                                  |                                                         | Fit <sup>†</sup>                                                        | Pre-frail <sup>‡</sup> | Frail <sup>§</sup> |                                                                                                                                                   |                                                                                                                                      |
| Masel 2009                                       | n=264 (26%)                                             |                                                                         | n=547 (54%)            | n=200 (20%)        |                                                                                                                                                   |                                                                                                                                      |
| N=1,011                                          | SF-36, mean (SD)                                        |                                                                         |                        |                    | Between frailty categories difference (ANOVA):                                                                                                    |                                                                                                                                      |
| Frailty: Fried                                   | Physical function 64.3 (27.7)                           |                                                                         | 44.5 (30.5)            | 23.3 (24.2)        | *                                                                                                                                                 |                                                                                                                                      |
| QoL: SF-36                                       | Role physical 80.6 (37.0)                               |                                                                         | 54.0 (47.1)            | 31.4 (43.2)        | *                                                                                                                                                 |                                                                                                                                      |
|                                                  | Bodily pain 77.2 (24.8)                                 |                                                                         | 64.1 (29.5)            | 49.7 (31.0)        | *                                                                                                                                                 |                                                                                                                                      |
|                                                  | General health 68.3 (17.3)                              |                                                                         | 57.7 (20.4)            | 43.5 (20.9)        | *                                                                                                                                                 |                                                                                                                                      |
|                                                  | Vitality 72.9 (18.4)                                    |                                                                         | 60.6 (22.1)            | 44.6 (22.6)        | *                                                                                                                                                 |                                                                                                                                      |
|                                                  | Social functioning 88.6 (20.7)                          |                                                                         | 71.6 (30.5)            | 47.8 (33.8)        | *                                                                                                                                                 |                                                                                                                                      |
|                                                  | Role emotional 94.6 (20.9)                              |                                                                         | 78.1 (40.2)            | 52.8 (48.3)        | *                                                                                                                                                 |                                                                                                                                      |
|                                                  | Mental health 84.8 (14.9)                               |                                                                         | 78.0 (19.6)            | 66.2 (21.4)        | *                                                                                                                                                 |                                                                                                                                      |
|                                                  | PCS 44.1 (10.4)                                         |                                                                         | 36.2 (11.9)            | 29.1 (9.9)         | *                                                                                                                                                 |                                                                                                                                      |
|                                                  | MCS 58.4 (6.3)                                          |                                                                         | 54.5 (10.7)            | 46.9 (12.7)        | *                                                                                                                                                 |                                                                                                                                      |
|                                                  |                                                         |                                                                         |                        |                    | Multiple linear regressions, QOL subscales as dependent variables.                                                                                | Multiple linear regression adjusted for age, sex, education, marital status, financial strain, arthritis, chronic illnesses, and BMI |
|                                                  |                                                         |                                                                         |                        |                    | pre-frail $\beta$ ; frail $\beta$                                                                                                                 |                                                                                                                                      |
|                                                  |                                                         |                                                                         |                        |                    | Physical function: -0.24 *; -0.44 *                                                                                                               |                                                                                                                                      |
|                                                  |                                                         |                                                                         |                        |                    | Role physical: -0.25 *; -0.38 *                                                                                                                   |                                                                                                                                      |
|                                                  |                                                         |                                                                         |                        |                    | Bodily pain: -0.18 *; -0.26 *                                                                                                                     |                                                                                                                                      |
|                                                  |                                                         |                                                                         |                        |                    | General health: -0.20 *; -0.41 *                                                                                                                  |                                                                                                                                      |
|                                                  |                                                         |                                                                         |                        |                    | Vitality: -0.22 *; -0.45 *                                                                                                                        |                                                                                                                                      |
|                                                  |                                                         |                                                                         |                        |                    | Social functioning: -0.24 *; -0.49 *                                                                                                              |                                                                                                                                      |
|                                                  |                                                         |                                                                         |                        |                    | Role emotional: -0.20 *; -0.38 *                                                                                                                  |                                                                                                                                      |
|                                                  |                                                         |                                                                         |                        |                    | Mental health: -0.16 *; -0.33 *                                                                                                                   |                                                                                                                                      |
|                                                  |                                                         |                                                                         |                        |                    | PCS: -0.26 *; -0.42 *                                                                                                                             |                                                                                                                                      |
|                                                  |                                                         |                                                                         |                        |                    | MCS: -0.18 *; -0.40 *                                                                                                                             |                                                                                                                                      |
|                                                  |                                                         |                                                                         |                        |                    | Logistic regression, odds ratios for the effect of frailty status on scoring in the lowest quartile of the SF-36 summary scales: pre-frail; frail | Logistic regression adjusted for age, sex, marital status, financial strain, arthritis, chronic illnesses, and BMI                   |
|                                                  |                                                         |                                                                         |                        |                    | PCS: 4.03 (1.95, 8.35); 10.58 (4.90, 22.84)                                                                                                       |                                                                                                                                      |
|                                                  |                                                         |                                                                         |                        |                    | MCS: 3.86 (2.07, 7.19); 10.20 (5.19, 20.07)                                                                                                       |                                                                                                                                      |
| Pinto 2016                                       | Number of participants not reported by frailty category |                                                                         |                        |                    | Pearson's correlation -0.175,                                                                                                                     |                                                                                                                                      |
| N=2,164                                          | QoL scores not reported by frailty category             |                                                                         |                        |                    | ANOVA F 14.117, ***;                                                                                                                              |                                                                                                                                      |
| Frailty: Fried                                   |                                                         |                                                                         |                        |                    | Path analysis, Satisfaction < = Frailty:                                                                                                          | Age, education, number of diseases, depressive symptoms, cognitive status, self-rated health                                         |
| QoL: Life satisfaction (unreferenced multi-item) |                                                         |                                                                         |                        |                    | estimate = -0.186, standard error <sup>1</sup> = 0.081 *                                                                                          |                                                                                                                                      |
|                                                  |                                                         |                                                                         |                        |                    | Standardized Direct Effects = -0.047,                                                                                                             |                                                                                                                                      |
|                                                  |                                                         |                                                                         |                        |                    | Standardized Indirect Effects = -0.025, **                                                                                                        |                                                                                                                                      |

| Study details                     |                                                    | Numbers of participants and QoL scores by frailty category <sup>a</sup> |                        |                    | Reported analyses of associations between frailty and QoL                                                                                                                                                         | Covariates adjusted for                                                                                   |
|-----------------------------------|----------------------------------------------------|-------------------------------------------------------------------------|------------------------|--------------------|-------------------------------------------------------------------------------------------------------------------------------------------------------------------------------------------------------------------|-----------------------------------------------------------------------------------------------------------|
|                                   |                                                    | Fit <sup>†</sup>                                                        | Pre-frail <sup>‡</sup> | Frail <sup>§</sup> |                                                                                                                                                                                                                   |                                                                                                           |
| Simone 2013                       | n=51 (54%)                                         |                                                                         | n=0 <sup>c</sup>       | n=44 (46%)         | Between frailty category means:<br>ANOVA F = 20.46, **                                                                                                                                                            |                                                                                                           |
| N=95                              | Life Satisfaction, mean (SD)                       |                                                                         |                        |                    |                                                                                                                                                                                                                   | In canonical correlation analysis:                                                                        |
| Frailty:                          | 27.94 (4.66)                                       |                                                                         |                        | 22.76 (6.30)       | Canonical correlation analysis:-                                                                                                                                                                                  | Functional status latent variable from frailty, social leisure engagement and solitary leisure engagement |
| Groningen Frailty Indicator       |                                                    |                                                                         |                        |                    | "Functional status" latent variable from frailty, social leisure engagement and solitary leisure engagement; "Subjective well being" latent variable from life satisfaction, positive affect and negative affect: | engagement and solitary leisure engagement                                                                |
| QoL: Satisfaction with Life Scale |                                                    |                                                                         |                        |                    | Frailty -> Functional status latent variable r=.844                                                                                                                                                               | Subjective well being latent variable from Life satisfaction, positive affect and negative affect         |
|                                   |                                                    |                                                                         |                        |                    | Functional status latent variable <-> Subjective well being latent variable r=.515                                                                                                                                |                                                                                                           |
| St John 2013                      | n=1287 (78%)                                       |                                                                         | n=0 <sup>c</sup>       | n=371 (22%)        | Linear regression models for each domain of life satisfaction as dependent variable:<br>B coefficient of frailty at time point 1:                                                                                 | Adjusted models adjusted for age, gender, education, and marital status                                   |
| N=988                             | QoL scores not reported by frailty category        |                                                                         |                        |                    | Unadjusted; Adjusted                                                                                                                                                                                              |                                                                                                           |
| Frailty:                          |                                                    |                                                                         |                        |                    | Health -0.64 *; -0.63 *                                                                                                                                                                                           |                                                                                                           |
| Cumulative                        |                                                    |                                                                         |                        |                    | Finances -0.15 *; -0.15 *                                                                                                                                                                                         |                                                                                                           |
| Deficit Model                     |                                                    |                                                                         |                        |                    | Family -0.28 *; -0.23 *                                                                                                                                                                                           |                                                                                                           |
| QoL: Life                         |                                                    |                                                                         |                        |                    | Friendships -0.35 *; -0.27 *                                                                                                                                                                                      |                                                                                                           |
| Satisfaction                      |                                                    |                                                                         |                        |                    | Housing -0.25 *; -0.20 *                                                                                                                                                                                          |                                                                                                           |
| terrible-delightful               |                                                    |                                                                         |                        |                    | Recreation -0.45 *; -0.40 *                                                                                                                                                                                       |                                                                                                           |
| scale                             |                                                    |                                                                         |                        |                    | Religion -0.19 *; -0.20 *                                                                                                                                                                                         |                                                                                                           |
|                                   |                                                    |                                                                         |                        |                    | Self-esteem -0.22 *; -0.18 *                                                                                                                                                                                      |                                                                                                           |
|                                   |                                                    |                                                                         |                        |                    | Transportation -0.31 *; -0.23 *                                                                                                                                                                                   |                                                                                                           |
|                                   |                                                    |                                                                         |                        |                    | Overall -0.41 *; -0.37 *                                                                                                                                                                                          |                                                                                                           |
|                                   |                                                    |                                                                         |                        |                    | Life satisfaction at time point 2 (5 years later) as dependent variable:<br>B coefficient of frailty at time point 1:                                                                                             |                                                                                                           |
|                                   |                                                    |                                                                         |                        |                    | Unadjusted; Adjusted                                                                                                                                                                                              |                                                                                                           |
|                                   |                                                    |                                                                         |                        |                    | Health -0.77 *; -0.70 *                                                                                                                                                                                           |                                                                                                           |
|                                   |                                                    |                                                                         |                        |                    | Finances -0.25 *; -0.21 *                                                                                                                                                                                         |                                                                                                           |
|                                   |                                                    |                                                                         |                        |                    | Family -0.24 *; -0.19 *                                                                                                                                                                                           |                                                                                                           |
|                                   |                                                    |                                                                         |                        |                    | Friendships -0.51 *; -0.43 *                                                                                                                                                                                      |                                                                                                           |
|                                   |                                                    |                                                                         |                        |                    | Housing -0.14; -0.05                                                                                                                                                                                              |                                                                                                           |
|                                   |                                                    |                                                                         |                        |                    | Recreation -0.48 *; -0.42 *                                                                                                                                                                                       |                                                                                                           |
|                                   |                                                    |                                                                         |                        |                    | Religion -0.15 *; -0.18 *                                                                                                                                                                                         |                                                                                                           |
|                                   |                                                    |                                                                         |                        |                    | Self-esteem -0.18 *; -0.04                                                                                                                                                                                        |                                                                                                           |
|                                   |                                                    |                                                                         |                        |                    | Transportation -0.53 *; -0.44 *                                                                                                                                                                                   |                                                                                                           |
|                                   |                                                    |                                                                         |                        |                    | Overall -0.32 *; -0.27 *                                                                                                                                                                                          |                                                                                                           |
| Wu 2013                           | Fit: n=80 (11%); Well: n=165 (24%)                 | Vulnerable: n=437 (63%)                                                 | Frail: n=17 (2%)       |                    |                                                                                                                                                                                                                   | Not reported                                                                                              |
| N=699                             | CASP-19, mean (SD)                                 |                                                                         |                        |                    | Between frailty category differences (ANOVA):                                                                                                                                                                     |                                                                                                           |
| Frailty: Other                    | Overall Fit:41.7 (7.0); Well:40.5 (5.8)            | 36.8 (7.0)                                                              | 34.1 (8.9)             | **                 |                                                                                                                                                                                                                   |                                                                                                           |
| QoL: CASP-19                      | - Control Fit: 7.4 (1.6); Well: 7.2 (1.3)          | 6.4 (1.4)                                                               | 7.1 (2.6)              | **                 |                                                                                                                                                                                                                   |                                                                                                           |
|                                   | - Autonomy Fit:11.8 (1.5); Well:11.3 (1.5)         | 10.3 (2.0)                                                              | 9.1 (2.8)              | **                 |                                                                                                                                                                                                                   |                                                                                                           |
|                                   | - Self-realisation Fit:12.4 (2.9); Well:12.5 (2.5) | 11.5 (2.9)                                                              | 10.5 (3.4)             | **                 |                                                                                                                                                                                                                   |                                                                                                           |
|                                   | - Pleasure Fit:10.2 (3.1); Well: 9.5 (2.7)         | 8.5 (2.6)                                                               | 7.4 (2.5)              | **                 |                                                                                                                                                                                                                   |                                                                                                           |

| Study details                                                                                                   | Numbers of participants and QoL scores by frailty category <sup>a</sup> |                        |                    | Reported analyses of associations between frailty and QoL                                                                                                                                                                                                       | Covariates adjusted for                                                             |
|-----------------------------------------------------------------------------------------------------------------|-------------------------------------------------------------------------|------------------------|--------------------|-----------------------------------------------------------------------------------------------------------------------------------------------------------------------------------------------------------------------------------------------------------------|-------------------------------------------------------------------------------------|
|                                                                                                                 | Fit <sup>†</sup>                                                        | Pre-frail <sup>‡</sup> | Frail <sup>§</sup> |                                                                                                                                                                                                                                                                 |                                                                                     |
| Yang 2016                                                                                                       | Number of participants not reported by frailty category                 |                        |                    | Linear regression, life satisfaction as dependent variable:<br>frailty index: B -23.85*** 95% CI(-26.67 to -21.03), SE 1.44, $\beta$ -0.46***.<br>Frailty index x Old-old: B = 5.17* 95% CI(1.18 to 9.16), SE = 2.04, $\beta$ = 0.07*<br>R <sup>2</sup> = 35.8% | urban/rural; gender; social vulnerability; old-old vs. Young-old; frailty x old-old |
| N=1,970<br>Frailty:<br>Cumulative<br>Deficit Model<br>QoL: Life<br>satisfaction<br>(unreferenced<br>multi-item) | QoL scores not reported by frailty category                             |                        |                    |                                                                                                                                                                                                                                                                 |                                                                                     |

- <sup>a</sup> Participants per frailty group are presented as n= number (percentage of whole sample). QoL scores are presented as one of mean (standard deviation [SD]), mean  $\pm$  standard error (SE), mean (95% confidence interval (95%CI)) or median [interquartile range (IQR)] for continuous variables and n= number (percentage of frailty group) for categorical variables.
- <sup>b</sup> Only people living with frailty were included.
- <sup>c</sup> The study only reported data in two frailty categories: Not frail and Frail. Data for Not frail participants is reported in the Fit (or robust) column.
- <sup>d</sup> The Pleasure scale of the CASP-19
- <sup>e</sup> The Control, Autonomy and Self-realisation scales of the CASP-19
- <sup>f</sup> In Jurschik 2012, SF-36 social functioning for frail participants is reported as 59.64 (3.9), which is an infeasibly small standard deviation and could not be correct given the overall sample standard deviation. We have assumed this is 23.9.
- <sup>g</sup> In Jurschik 2012, between groups p-value for SF-36 Role physical is reported in the table as 0.58 but this is contradicted in the text "the HRQoL indices ( $p < 0.001$ ), with the exception of BP [bodily pain], were higher in frail than in non-frail participants" and does not fit with the means and standard deviations reported. We have corrected this to  $p < 0.001$ .
- <sup>h</sup> In Jurschik 2012, the methods imply that each SF-36 domain except bodily pain was entered into a logistic regression model (bodily pain not significantly different between groups). The only results reported from the logistic regression are for statistically significant variables. Therefore, we assumed that  $p > .05$  for each SF-36 domain except bodily pain in the logistic regression model, although this is not explicitly reported.
- <sup>j</sup> In Pinto 2016, "SE" column heading is explained as "standardized estimates", but the values reported equate with standard errors when compared to the estimates and p-values, and standardised estimates are reported elsewhere in the table. Therefore, we have corrected this to standard error.
- <sup>†</sup> Fit (or robust)
- <sup>‡</sup> Pre-frail (or vulnerable)
- <sup>§</sup> Frail (or moderate-severe frailty)
- <sup>-</sup>  $p > 0.05$
- <sup>\*</sup>  $p \leq 0.05$  Note that studies may not have reported specific p-values or the ranges adopted here. Therefore an indication of  $p \leq 0.05$  may not preclude  $p \leq 0.01$  or  $p \leq 0.001$  for example.
- <sup>\*\*</sup>  $p \leq 0.01$
- <sup>\*\*\*</sup>  $p \leq 0.001$
